# Supplementary material for: Spatial estimation of air PM 2.5 emissions using activity data, local emission factors and land cover derived from satellite imagery
Source: Copernicus journal article supplement (doi:10.5194/amt-10-3313-2017), 2017-09-11
Supplement: Supplementary file 1 [file amt-10-3313-2017-supplement.zip]

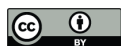

## *Supplement of*

# **Spatial estimation of air PM<sub>2.5</sub> emissions using activity data, local emission factors and land cover derived from satellite imagery**

**Hezron P. Gibe and Mylene G. Cayetano**

*Correspondence to:* Mylene G. Cayetano ([mcayetano@iesm.upd.edu.ph](mailto:mcayetano@iesm.upd.edu.ph))

- [amt-10-3313-2017-supplement-title-page.pdf](#)
- Data attachment - Emission estimation spreadsheet (CabBrgysEMF(fixed)).xlsx
- Data attachment - Emission table for GIS mapping (CabFuelstable-v2).xls
- Data attachment - Land zoning table for GIS mapping (CabZoneSq).xls

The copyright of individual parts of the supplement might differ from the CC BY 3.0 License.
