# Supplementary material for: Spatial estimation of air PM 2.5 emissions using activity data, local emission factors and land cover derived from satellite imagery
Source: Copernicus journal article supplement (doi:10.5194/amt-10-3313-2017), 2017-09-11
Supplement: Supplementary file 1 [file Data attachment - Emission estimation spreadsheet (CabBrgysEMF(fixed)).xlsx]

## Sheet: PM2.5 per square
OBJECTID	Brgyname	ProjPop2015	AreaHect	AreaSqkm	Density	RUType	HouseholdsSEP2015	HouseholdsEstimate	HouseholdDensity	HHperSq	KwhperHH	KgCoalperSq	MtCoalperSq	KgPM10perMtCoal	KgPM10perSq	LPGKgperSq	KgPM10perKlLPG	C4LPGDensityKgL	LPGLperSq	LPGKlperSq	KgPM10LperSq	KgPM25perKgFuelRosales	KgChperHH2010	KgChperHHNov2016Survey	HECS2011HHFactor	KgPM25FuelsCharcoalperSq	KgPM25perKgFuelGrilling	KgPM25perSqGrill	KgPM25MCTCperUnit	TotalEstmMCTCUnitsBrgySelection	Nov2016PlusNonTODATricyclesFactor	HHDensityFactor	EstMCTCUnitsPerBrgy	EstMCTCPerSq	Nov2016KmTraveled	Nov2016DaysInServiceFactor	KgPM25MCTCPerSq	TotalPUVForHireLTO	KgPM25PUVperUnit	KgPM25PUVEstPerSqNatlRd	TotalEstmPUVUnitsBrgySelection	EstPUVUnitsPerBrgy	KgPM25PUVEstPerSqNonNatlRd	KgPM25PUVEstPerSqCenterBrgy	YearlyRiceProductionKg2014CLUP2016	RiceAreaWetHa2014	RiceAreaDryHa2014	RiceAreaAvgHa2014	YearlyStrawKg2013NLA
1	Aduas Norte	5802	73.43	0.7343	7901.4	Urban	835	1450.5	1137.14	11.3714	2587.84	14015.4	14.0154	1.035	14.5059	1125.77	0.072	0.57996	1941.11	1.94111	0.13976	0.051	194	173.299	0.353	0.354775	0.012	0.264726	6.63048e-05	11324.3	1.15267	0.0060259	78.6567	1.07118	87.2131	0.951172	0.00589179	1530	0.0122984	0.00723715	866.307	5.22028	0.000874316	0.00127865
2	Aduas Sur	7039	34.65	0.3465	20314.6	Urban	1487	1759.75	4291.49	42.9149	2587.84	52893.2	52.8932	1.035	54.7445	4248.57	0.072	0.57996	7325.63	7.32563	0.527445	0.051	194	173.299	0.353	1.3389	0.012	0.999058	6.63048e-05	11324.3	1.15267	0.0227414	296.845	8.56697	87.2131	0.951172	0.0471208	1530	0.0122984	0.00723715	866.307	19.701	0.00699251	0.00482554
3	Bantug Bulalo	2404	16.03	0.1603	14996.9	Urban	709	601	4422.96	44.2296	2587.84	54513.6	54.5136	1.035	56.4216	4378.73	0.072	0.57996	7550.05	7.55005	0.543604	0.051	194	173.299	0.353	1.37992	0.012	1.02966	6.63048e-05	11324.3	1.15267	0.0234381	305.939	19.0854	87.2131	0.951172	0.104975	1530	0.0122984	0.00723715	866.307	20.3046	0.0155779	0.00497338
4	Bantug Norte	8752	123.07	1.2307	7111.4	Urban	1892	2188	1537.34	15.3734	2587.84	18947.9	18.9479	1.035	19.6111	1521.96	0.072	0.57996	2624.26	2.62426	0.188946	0.051	194	173.299	0.353	0.479633	0.012	0.357892	6.63048e-05	11324.3	1.15267	0.00814663	106.339	0.864051	87.2131	0.951172	0.00475253	1530	0.0122984	0.00723715	866.307	7.05748	0.000705254	0.00172865
5	Barrera	6666	28.92	0.2892	23049.8	Urban	1415	1666.5	4892.81	48.9281	2587.84	60304.6	60.3046	1.035	62.4153	4843.88	0.072	0.57996	8352.09	8.35209	0.601351	0.051	194	173.299	0.353	1.52651	0.012	1.13905	6.63048e-05	11324.3	1.15267	0.0259279	338.439	11.7026	87.2131	0.951172	0.0643677	1530	0.0122984	0.00723715	866.307	22.4615	0.00955188	0.0055017
6	Bernardo	1294	4.87	0.0487	26570.8	Urban	318	323.5	6529.77	65.2977	2587.84	80480.5	80.4805	1.035	83.2973	6464.48	0.072	0.57996	11146.4	11.1464	0.802542	0.051	194	173.299	0.353	2.03722	0.012	1.52013	6.63048e-05	11324.3	1.15267	0.0346025	451.669	92.7453	87.2131	0.951172	0.510126	1530	0.0122984	0.00723715	866.307	29.9764	0.0757004	0.00734238
7	Bitas	5667	165.75	1.6575	3419	Urban	1268	1416.75	765.008	7.65008	2587.84	9428.84	9.42884	1.035	9.75885	757.357	0.072	0.57996	1305.88	1.30588	0.0940233	0.051	194	173.299	0.353	0.238674	0.012	0.178094	6.63048e-05	11324.3	1.15267	0.00405392	52.9162	0.319253	87.2131	0.951172	0.00175598	1530	0.0122984	0.00723715	866.307	3.51194	0.00026058	0.00086021
8	Bonifacio	3063	10.17	0.1017	30118	Urban	773	765.75	7600.79	76.0079	2587.84	93680.9	93.6809	1.035	96.9597	7524.78	0.072	0.57996	12974.7	12.9747	0.934175	0.051	194	173.299	0.353	2.37137	0.012	1.76946	6.63048e-05	11324.3	1.15267	0.040278	525.752	51.6964	87.2131	0.951172	0.284345	1530	0.0122984	0.00723715	866.307	34.8931	0.0421955	0.00854667
9	Caridad	1901	13.21	0.1321	14390.6	Urban	591	475.25	4473.88	44.7388	2587.84	55141.3	55.1413	1.035	57.0713	4429.14	0.072	0.57996	7636.98	7.63698	0.549863	0.051	194	173.299	0.353	1.39581	0.012	1.04152	6.63048e-05	11324.3	1.15267	0.0237079	309.462	23.4263	87.2131	0.951172	0.128852	1530	0.0122984	0.00723715	866.307	20.5383	0.019121	0.00503064
10	Caudillo	1534	315.21	3.1521	486.66	Rural	221	383.5	70.112	0.70112	2252.4	752.13	0.75213	1.035	0.778454	69.4109	0.072	0.57996	119.682	0.119682	0.00861712	0.051	147	131.314	0.353	0.0165748	0.012	0.0123678	6.63048e-05	11324.3	1.15267	0.000371536	4.8497	0.0153856	87.2131	0.951172	8.46253e-05	1530	0.0122984	0.00723715	866.307	0.321865	1.2558e-05	7.88371e-05	42160	62.55	1	31.775	44786.9
11	Supermarket	151	6.54	0.0654	2308.87	Urban	75	37.75	1146.79	11.4679	2587.84	14134.4	14.1344	1.035	14.6291	1135.32	0.072	0.57996	1957.59	1.95759	0.140946	0.051	194	173.299	0.353	0.357786	0.012	0.266972	6.63048e-05	11324.3	1.15267	0.00607705	79.3243	12.1291	87.2131	0.951172	0.0667135	1530	0.0122984	0.00723715	866.307	5.26459	0.00989999	0.0012895
12	Dicarma	3523	19.57	0.1957	18002	Urban	719	880.75	3673.99	36.7399	2587.84	45282.5	45.2825	1.035	46.8674	3637.25	0.072	0.57996	6271.56	6.27156	0.451552	0.051	194	173.299	0.353	1.14625	0.012	0.855305	6.63048e-05	11324.3	1.15267	0.0194692	254.133	12.9858	87.2131	0.951172	0.0714258	1530	0.0122984	0.00723715	866.307	16.8663	0.0105993	0.0041312
13	Dimasalang	1543	13.95	0.1395	11060.9	Urban	447	385.75	3204.3	32.043	2587.84	39493.5	39.4935	1.035	40.8758	3172.26	0.072	0.57996	5469.79	5.46979	0.393825	0.051	194	173.299	0.353	0.999709	0.012	0.745961	6.63048e-05	11324.3	1.15267	0.0169802	221.644	15.8885	87.2131	0.951172	0.0873911	1530	0.0122984	0.00723715	866.307	14.71	0.0129684	0.00360306
14	DS Garcia	6597	108.53	1.0853	6078.5	Urban	842	1649.25	775.822	7.75822	2587.84	9562.13	9.56213	1.035	9.89681	768.064	0.072	0.57996	1324.34	1.32434	0.0953525	0.051	194	173.299	0.353	0.242049	0.012	0.180611	6.63048e-05	11324.3	1.15267	0.00411123	53.6642	0.494464	87.2131	0.951172	0.0027197	1530	0.0122984	0.00723715	866.307	3.56158	0.000403591	0.00087237
15	Fatima	955	3.64	0.0364	26236.3	Urban	275	238.75	7554.95	75.5495	2587.84	93115.9	93.1159	1.035	96.3749	7479.4	0.072	0.57996	12896.4	12.8964	0.928541	0.051	194	173.299	0.353	2.35707	0.012	1.75879	6.63048e-05	11324.3	1.15267	0.0400351	522.581	143.566	87.2131	0.951172	0.789656	1530	0.0122984	0.00723715	866.307	34.6826	0.117181	0.00849513
16	Gen Luna	2049	4.9	0.049	41816.3	Urban	604	512.25	12326.5	123.265	2587.84	151926	151.926	1.035	157.244	12203.3	0.072	0.57996	21041.6	21.0416	1.51499	0.051	194	173.299	0.353	3.84575	0.012	2.86962	6.63048e-05	11324.3	1.15267	0.0653206	852.635	174.007	87.2131	0.951172	0.95709	1530	0.0122984	0.00723715	866.307	56.5877	0.142028	0.0138605
17	H Concepcion	3485	248.06	2.4806	1404.9	Urban	373	871.25	150.367	1.50367	2587.84	1853.3	1.8533	1.035	1.91816	148.863	0.072	0.57996	256.678	0.256678	0.0184808	0.051	194	173.299	0.353	0.0469129	0.012	0.0350054	6.63048e-05	11324.3	1.15267	0.000796822	10.401	0.0419293	87.2131	0.951172	0.000230623	1530	0.0122984	0.00723715	866.307	0.690292	3.42235e-05	0.000169079
18	Imelda	4239	20.3	0.203	20881.8	Urban	918	1059.75	4522.17	45.2217	2587.84	55736.4	55.7364	1.035	57.6872	4476.95	0.072	0.57996	7719.41	7.71941	0.555797	0.051	194	173.299	0.353	1.41087	0.012	1.05276	6.63048e-05	11324.3	1.15267	0.0239638	312.802	15.409	87.2131	0.951172	0.0847537	1530	0.0122984	0.00723715	866.307	20.76	0.0125771	0.00508493
19	Isla	1149	86.89	0.8689	1322.36	Rural	210	287.25	241.685	2.41685	2252.4	2592.69	2.59269	1.035	2.68343	239.268	0.072	0.57996	412.56	0.41256	0.0297043	0.051	147	131.314	0.353	0.0571354	0.012	0.0426332	6.63048e-05	11324.3	1.15267	0.00128073	16.7175	0.192399	87.2131	0.951172	0.00105825	1530	0.0122984	0.00723715	866.307	1.10951	0.000157039	0.000271762	4000	0	1	1	4249.23
20	Kapitan Pepe	4120	93.27	0.9327	4417.28	Urban	841	1030	901.683	9.01683	2587.84	11113.4	11.1134	1.035	11.5024	892.666	0.072	0.57996	1539.19	1.53919	0.110821	0.051	194	173.299	0.353	0.281316	0.012	0.209912	6.63048e-05	11324.3	1.15267	0.00477819	62.3701	0.668705	87.2131	0.951172	0.00367807	1530	0.0122984	0.00723715	866.307	4.13938	0.000545809	0.00101389
21	MS Garcia	4002	30.12	0.3012	13286.9	Urban	195	1000.5	647.41	6.4741	2587.84	7979.43	7.97943	1.035	8.25871	640.936	0.072	0.57996	1105.14	1.10514	0.07957	0.051	194	173.299	0.353	0.201985	0.012	0.150717	6.63048e-05	11324.3	1.15267	0.00343075	44.7819	1.48678	87.2131	0.951172	0.00817773	1530	0.0122984	0.00723715	866.307	2.97208	0.00121354	0.000727978
22	Mabini Ext	3291	25.34	0.2534	12987.4	Urban	249	822.75	982.636	9.82636	2587.84	12111.1	12.1111	1.035	12.535	972.81	0.072	0.57996	1677.37	1.67737	0.120771	0.051	194	173.299	0.353	0.306572	0.012	0.228758	6.63048e-05	11324.3	1.15267	0.00520717	67.9697	2.68231	87.2131	0.951172	0.0147535	1530	0.0122984	0.00723715	866.307	4.51101	0.00218935	0.00110492
23	Mabini Homesite	4689	67.55	0.6755	6941.52	Urban	922	1172.25	1364.91	13.6491	2587.84	16822.8	16.8228	1.035	17.4116	1351.27	0.072	0.57996	2329.93	2.32993	0.167755	0.051	194	173.299	0.353	0.425839	0.012	0.317752	6.63048e-05	11324.3	1.15267	0.00723294	94.4122	1.39766	87.2131	0.951172	0.00768755	1530	0.0122984	0.00723715	866.307	6.26594	0.0011408	0.00153477
24	Magsaysay	4704	57.35	0.5735	8202.27	Urban	561	1176	978.204	9.78204	2587.84	12056.5	12.0565	1.035	12.4785	968.422	0.072	0.57996	1669.81	1.66981	0.120226	0.051	194	173.299	0.353	0.30519	0.012	0.227726	6.63048e-05	11324.3	1.15267	0.00518368	67.6631	1.17983	87.2131	0.951172	0.00648939	1530	0.0122984	0.00723715	866.307	4.49066	0.000962997	0.00109994	288510	64.8	65.05	64.925	306486
25	Magsaysay South	2216	44.43	0.4443	4987.62	Urban	1203	554	2707.63	27.0763	2587.84	33372	33.372	1.035	34.54	2680.55	0.072	0.57996	4621.96	4.62196	0.332781	0.051	194	173.299	0.353	0.844753	0.012	0.630336	6.63048e-05	11324.3	1.15267	0.0143482	187.289	4.21537	87.2131	0.951172	0.0231857	1530	0.0122984	0.00723715	866.307	12.43	0.00344066	0.00304458
26	Ma Theresa	1010	6.88	0.0688	14680.2	Urban	925	252.5	13444.8	134.448	2587.84	165709	165.709	1.035	171.509	13310.3	0.072	0.57996	22950.4	22.9504	1.65243	0.051	194	173.299	0.353	4.19463	0.012	3.12994	6.63048e-05	11324.3	1.15267	0.0712463	929.985	135.172	87.2131	0.951172	0.743486	1530	0.0122984	0.00723715	866.307	61.7212	0.11033	0.0151179
27	Matadero	1216	4.25	0.0425	28611.8	Urban	408	304	9600	96	2587.84	118322	118.322	1.035	122.463	9504	0.072	0.57996	16387.3	16.3873	1.17989	0.051	194	173.299	0.353	2.9951	0.012	2.23488	6.63048e-05	11324.3	1.15267	0.0508722	664.039	156.245	87.2131	0.951172	0.85939	1530	0.0122984	0.00723715	866.307	44.0709	0.12753	0.0107947
28	Melojavilla	677	5.98	0.0598	11321.1	Urban	1137	169.25	19013.4	190.134	2587.84	234343	234.343	1.035	242.545	18823.2	0.072	0.57996	32456.1	32.4561	2.33684	0.051	194	173.299	0.353	5.93198	0.012	4.42631	6.63048e-05	11324.3	1.15267	0.100755	1315.17	219.928	87.2131	0.951172	1.20967	1530	0.0122984	0.00723715	866.307	87.2851	0.179509	0.0213795
29	Nabao	725	3.74	0.0374	19385	Urban	236	181.25	6310.16	63.1016	2587.84	77773.7	77.7737	1.035	80.4958	6247.06	0.072	0.57996	10771.5	10.7715	0.775551	0.051	194	173.299	0.353	1.96871	0.012	1.46901	6.63048e-05	11324.3	1.15267	0.0334387	436.479	116.706	87.2131	0.951172	0.641914	1530	0.0122984	0.00723715	866.307	28.9682	0.0952572	0.00709543
30	Padre Burgos	742	4.24	0.0424	17500	Urban	159	185.5	3750	37.5	2587.84	46219.3	46.2193	1.035	47.837	3712.5	0.072	0.57996	6401.3	6.4013	0.460894	0.051	194	173.299	0.353	1.16996	0.012	0.873	6.63048e-05	11324.3	1.15267	0.0198719	259.39	61.177	87.2131	0.951172	0.336491	1530	0.0122984	0.00723715	866.307	17.2152	0.0499338	0.00421667
31	Padre Crisostomo	4292	50.13	0.5013	8561.74	Urban	961	1073	1917.02	19.1702	2587.84	23627.5	23.6275	1.035	24.4545	1897.85	0.072	0.57996	3272.37	3.27237	0.235611	0.051	194	173.299	0.353	0.598089	0.012	0.446281	6.63048e-05	11324.3	1.15267	0.0101586	132.601	2.64515	87.2131	0.951172	0.0145491	1530	0.0122984	0.00723715	866.307	8.80048	0.00215902	0.00215558
32	Quezon	2008	22.51	0.2251	8920.48	Urban	787	502	3496.22	34.9622	2587.84	43091.5	43.0915	1.035	44.5997	3461.26	0.072	0.57996	5968.11	5.96811	0.429704	0.051	194	173.299	0.353	1.09079	0.012	0.813921	6.63048e-05	11324.3	1.15267	0.0185271	241.836	10.7435	87.2131	0.951172	0.0590924	1530	0.0122984	0.00723715	866.307	16.0502	0.00876905	0.00393131
33	Rizdelis	804	5.36	0.0536	15000	Urban	300	201	5597.01	55.9701	2587.84	68984.1	68.9841	1.035	71.3985	5541.04	0.072	0.57996	9554.19	9.55419	0.687901	0.051	194	173.299	0.353	1.74621	0.012	1.30299	6.63048e-05	11324.3	1.15267	0.0296596	387.15	72.2294	87.2131	0.951172	0.397283	1530	0.0122984	0.00723715	866.307	25.6943	0.058955	0.00629354
34	San Isidro	5010	487.4	4.874	1027.9	Rural	564	1252.5	115.716	1.15716	2252.4	1241.35	1.24135	1.035	1.2848	114.559	0.072	0.57996	197.529	0.197529	0.0142221	0.051	147	131.314	0.353	0.0273558	0.012	0.0204123	6.63048e-05	11324.3	1.15267	0.000613201	8.00417	0.0164222	87.2131	0.951172	9.03267e-05	1530	0.0122984	0.00723715	866.307	0.53122	1.34041e-05	0.000130116	5273350	325.6	355.44	340.52	5.60192e+06
35	San Josef Norte	4651	55	0.55	8456.36	Urban	987	1162.75	1794.55	17.9455	2587.84	22118.1	22.1181	1.035	22.8922	1776.6	0.072	0.57996	3063.32	3.06332	0.220559	0.051	194	173.299	0.353	0.55988	0.012	0.41777	6.63048e-05	11324.3	1.15267	0.00950963	124.13	2.25691	87.2131	0.951172	0.0124137	1530	0.0122984	0.00723715	866.307	8.23826	0.00184213	0.00201787
36	San Josef Sur	6844	72.24	0.7224	9473.98	Urban	1198	1711	1658.36	16.5836	2587.84	20439.6	20.4396	1.035	21.1549	1641.78	0.072	0.57996	2830.85	2.83085	0.203821	0.051	194	173.299	0.353	0.517392	0.012	0.386066	6.63048e-05	11324.3	1.15267	0.00878796	114.71	1.5879	87.2131	0.951172	0.00873392	1530	0.0122984	0.00723715	866.307	7.61307	0.00129608	0.00186474
37	San Juan Pob	6926	83	0.83	8344.58	Urban	1141	1731.5	1374.7	13.747	2587.84	16943.4	16.9434	1.035	17.5364	1360.95	0.072	0.57996	2346.63	2.34663	0.168957	0.051	194	173.299	0.353	0.428892	0.012	0.32003	6.63048e-05	11324.3	1.15267	0.00728478	95.089	1.14565	87.2131	0.951172	0.0063014	1530	0.0122984	0.00723715	866.307	6.31086	0.0009351	0.00154577
38	San Roque Norte	1261	7.03	0.0703	17937.4	Urban	225	315.25	3200.57	32.0057	2587.84	39447.5	39.4475	1.035	40.8282	3168.56	0.072	0.57996	5463.42	5.46342	0.393366	0.051	194	173.299	0.353	0.998545	0.012	0.745092	6.63048e-05	11324.3	1.15267	0.0169604	221.386	31.4916	87.2131	0.951172	0.173213	1530	0.0122984	0.00723715	866.307	14.6929	0.025704	0.00359887
39	San Roque Sur	1401	2.51	0.0251	55816.7	Urban	401	350.25	15976.1	159.761	2587.84	196908	196.908	1.035	203.8	15816.3	0.072	0.57996	27271.4	27.2714	1.96354	0.051	194	173.299	0.353	4.98438	0.012	3.71924	6.63048e-05	11324.3	1.15267	0.0846603	1105.08	440.27	87.2131	0.951172	2.42161	1530	0.0122984	0.00723715	866.307	73.3418	0.359357	0.0179643
40	Sanbermicristi	1542	7.45	0.0745	20698	Urban	449	385.5	6026.85	60.2685	2587.84	74281.8	74.2818	1.035	76.8817	5966.58	0.072	0.57996	10287.9	10.2879	0.74073	0.051	194	173.299	0.353	1.88031	0.012	1.40305	6.63048e-05	11324.3	1.15267	0.0319374	416.881	55.9572	87.2131	0.951172	0.307781	1530	0.0122984	0.00723715	866.307	27.6676	0.0456733	0.00677686
41	Sangitan East	2100	10.72	0.1072	19589.6	Urban	580	525	5410.45	54.1045	2587.84	66684.6	66.6846	1.035	69.0186	5356.34	0.072	0.57996	9235.71	9.23571	0.664971	0.051	194	173.299	0.353	1.688	0.012	1.25955	6.63048e-05	11324.3	1.15267	0.028671	374.245	34.9109	87.2131	0.951172	0.19202	1530	0.0122984	0.00723715	866.307	24.8379	0.0284949	0.00608376
42	Sangitan	2384	32.43	0.3243	7351.22	Urban	669	596	2062.9	20.629	2587.84	25425.6	25.4256	1.035	26.3155	2042.28	0.072	0.57996	3521.41	3.52141	0.253541	0.051	194	173.299	0.353	0.643605	0.012	0.480244	6.63048e-05	11324.3	1.15267	0.0109317	142.693	4.40002	87.2131	0.951172	0.0242014	1530	0.0122984	0.00723715	866.307	9.47022	0.00359138	0.00231962
43	Sta Arcadia	4355	744.78	7.4478	584.736	Rural	225	1088.75	30.2103	0.302103	2252.4	324.082	0.324082	1.035	0.335425	29.9082	0.072	0.57996	51.5694	0.0515694	0.00371299	0.051	147	131.314	0.353	0.00714184	0.012	0.00532909	6.63048e-05	11324.3	1.15267	0.00016009	2.08967	0.00280575	87.2131	0.951172	1.54324e-05	1530	0.0122984	0.00723715	866.307	0.138687	2.2901e-06	3.39698e-05	8325710	590.58	519.58	555.08	8.84446e+06
44	Sto Nino	1960	183.8	1.838	1066.38	Rural	614	490	334.059	3.34059	2252.4	3583.63	3.58363	1.035	3.70906	330.718	0.072	0.57996	570.243	0.570243	0.0410575	0.051	147	131.314	0.353	0.078973	0.012	0.058928	6.63048e-05	11324.3	1.15267	0.00177024	23.1071	0.125719	87.2131	0.951172	0.000691489	1530	0.0122984	0.00723715	866.307	1.53357	0.000102614	0.000375631	2351490	180.2	153.7	166.95	2.49801e+06
45	Valle Cruz	4179	434.04	4.3404	962.814	Rural	697	1044.75	160.584	1.60584	2252.4	1722.68	1.72268	1.035	1.78297	158.978	0.072	0.57996	274.12	0.27412	0.0197366	0.051	147	131.314	0.353	0.0379629	0.012	0.0283271	6.63048e-05	11324.3	1.15267	0.000850966	11.1077	0.0255915	87.2131	0.951172	0.000140761	1530	0.0122984	0.00723715	866.307	0.737197	2.08883e-05	0.000180568	5329710	340	357.1	348.55	5.66179e+06
46	Vijandre	1496	7.78	0.0778	19228.8	Urban	328	374	4215.94	42.1594	2587.84	51962.1	51.9621	1.035	53.7808	4173.78	0.072	0.57996	7196.67	7.19667	0.51816	0.051	194	173.299	0.353	1.31533	0.012	0.98147	6.63048e-05	11324.3	1.15267	0.022341	291.62	37.4832	87.2131	0.951172	0.206169	1530	0.0122984	0.00723715	866.307	19.3542	0.0305945	0.00474059
47	Villa Ofelia Caridad	1267	7.16	0.0716	17695.5	Urban	366	316.75	5111.73	51.1173	2587.84	63002.9	63.0029	1.035	65.208	5060.61	0.072	0.57996	8725.8	8.7258	0.628258	0.051	194	173.299	0.353	1.59481	0.012	1.19001	6.63048e-05	11324.3	1.15267	0.027088	353.582	49.383	87.2131	0.951172	0.271621	1530	0.0122984	0.00723715	866.307	23.4665	0.0403073	0.00574787
48	Zulueta	1586	35.72	0.3572	4440.09	Urban	431	396.5	1206.61	12.0661	2587.84	14871.6	14.8716	1.035	15.3921	1194.54	0.072	0.57996	2059.7	2.0597	0.148298	0.051	194	173.299	0.353	0.376449	0.012	0.280898	6.63048e-05	11324.3	1.15267	0.00639403	83.4619	2.33656	87.2131	0.951172	0.0128518	1530	0.0122984	0.00723715	866.307	5.53919	0.00190714	0.00135676
[truncated: 2 more columns]
