# Supplementary material for: Spatial estimation of air PM 2.5 emissions using activity data, local emission factors and land cover derived from satellite imagery
Source: Copernicus journal article supplement (doi:10.5194/amt-10-3313-2017), 2017-09-11
Supplement: Supplementary file 2 [file amt-10-3313-2017-supplement.zip]

Archive with 4 entries (4 files):
- Data attachment - Emission estimation spreadsheet (CabBrgysEMF(fixed)).xlsx
- Data attachment - Emission table for GIS mapping (CabFuelstable-v2).xls
- Data attachment - Land zoning table for GIS mapping (CabZoneSq).xls
- amt-10-3313-2017-supplement-title-page.pdf
