# Supplementary material for: Spatial estimation of air PM 2.5 emissions using activity data, local emission factors and land cover derived from satellite imagery
Source: Copernicus journal article supplement (doi:10.5194/amt-10-3313-2017), 2017-09-11
Supplement: Supplementary file 2 [file amt-10-3313-2017-supplement.zip › Data attachment - Land zoning table for GIS mapping (CabZoneSq).xls]

## Sheet: Sheet1
FIDZ	ZoneType
0	Open
1	Open
2	Residential
3	Residential
4	Residential
5	Residential
6	Open
7	Open
8	Open
9	Open
10	Open
11	Open
12	Open
13	Open
14	Open
15	Open
16	Open
17	Open
18	Open
19	Open
20	Open
21	Open
22	Open
23	Open
24	Open
25	Open
26	Residential
27	Residential
28	Residential
29	Residential
30	Residential
31	Residential
32	Commercial
33	Residential
34	Open
35	Open
36	Open
37	Open
38	Open
39	Open
40	Open
41	Open
42	Open
43	Open
44	Open
45	Open
46	Open
47	Open
48	Open
49	Open
50	Open
51	Open
52	Commercial
53	Residential
54	Residential
55	Residential
56	Residential
57	Residential
58	Residential
59	Open
60	Open
61	Open
62	Open
63	Open
64	Open
65	Open
66	Open
67	Open
68	Open
69	Open
70	Open
71	Open
72	Open
73	Open
74	Residential
75	Open
76	Residential
77	Residential
78	Residential
79	Residential
80	Residential
81	Open
82	Residential
83	Open
84	Residential
85	Open
86	Open
87	Open
88	Open
89	Open
90	Open
91	Open
92	Open
93	Open
94	Open
95	Open
96	Open
97	Open
98	Open
99	Commercial
100	Open
101	Residential
102	Residential
103	Residential
104	Residential
105	Open
106	Residential
107	Residential
108	Residential
109	Residential
110	Open
111	Open
112	Open
113	Open
114	Open
115	Open
116	Open
117	Open
118	Open
119	Open
120	Commercial
121	Open
122	Open
123	Open
124	Open
125	Open
126	Residential
127	Residential
128	Residential
129	Open
130	Residential
131	Open
132	Residential
133	Residential
134	Open
135	Open
136	Open
137	Open
138	Open
139	Open
140	Open
141	Open
142	Open
143	Open
144	Commercial
145	Commercial
146	Commercial
147	Residential
148	Open
149	Open
150	Residential
151	Residential
152	Open
153	Open
154	Commercial
155	Residential
156	Commercial
157	Residential
158	Residential
159	Open
160	Open
161	Open
162	Open
163	Open
164	Open
165	Open
166	Open
167	Open
168	Open
169	Open
170	Open
171	Residential
172	Open
173	Open
174	Open
175	Residential
176	Open
177	Open
178	Commercial
179	Residential
180	Residential
181	Residential
182	Residential
183	Residential
184	Open
185	Open
186	Open
187	Open
188	Open
189	Open
190	Open
191	Open
192	Residential
193	Residential
194	Open
195	Residential
196	Residential
197	Open
198	Open
199	Open
200	Open
201	Open
202	Residential
203	Residential
204	Residential
205	Residential
206	Residential
207	Residential
208	Residential
209	Open
210	Open
211	Open
212	Open
213	Open
214	Open
215	Open
216	Commercial
217	Commercial
218	Residential
219	Residential
220	Open
221	Open
222	Open
223	Open
224	Open
225	Open
226	Residential
227	Residential
228	Residential
229	Residential
230	Open
231	Residential
232	Residential
233	Open
234	Open
235	Open
236	Open
237	Open
238	Open
239	Open
240	Commercial
241	Open
242	Open
243	Residential
244	Open
245	Open
246	Open
247	Open
248	Open
249	Residential
250	Residential
251	Residential
252	Commercial
253	Residential
254	Residential
255	Residential
256	Residential
257	Residential
258	Open
259	Open
260	Open
261	Open
262	Open
263	Open
264	Open
265	Residential
266	Residential
267	Commercial
268	Open
269	Open
270	Open
271	Open
272	Commercial
273	Open
274	Residential
275	Residential
276	Residential
277	Residential
278	Residential
279	Residential
280	Residential
281	Residential
282	Open
283	Open
284	Open
285	Open
286	Open
287	Residential
288	Open
289	Residential
290	Residential
291	Residential
292	Residential
293	Open
294	Open
295	Open
296	Open
297	Residential
298	Residential
299	Residential
300	Residential
301	Residential
302	Residential
303	Residential
304	Residential
305	Commercial
306	Residential
307	Open
308	Open
309	Open
310	Open
311	Open
312	Residential
313	Residential
314	Residential
315	Residential
316	Residential
317	Commercial
318	Commercial
319	Open
320	Open
321	Residential
322	Residential
323	Residential
324	Residential
325	Open
326	Open
327	Commercial
328	Open
329	Residential
330	Residential
331	Open
332	Open
333	Residential
334	Residential
335	Open
336	Open
337	Residential
338	Residential
339	Residential
340	Residential
341	Residential
342	Commercial
343	Open
344	Open
345	Commercial
346	Open
347	Commercial
348	Commercial
349	Residential
350	Residential
351	Commercial
352	Open
353	Residential
354	Residential
355	Open
356	Open
357	Open
358	Open
359	Open
360	Open
361	Open
362	Residential
363	Residential
364	Residential
365	Commercial
366	Residential
367	Open
368	Open
369	Open
370	Open
371	Commercial
372	Open
373	Residential
374	Open
375	Open
376	Commercial
377	Commercial
378	Residential
379	Residential
380	Residential
381	Open
382	Open
383	Open
384	Open
385	Open
386	Open
387	Open
388	Residential
389	Residential
390	Residential
391	Residential
392	Open
393	Open
394	Commercial
395	Open
396	Commercial
397	Residential
398	Residential
399	Residential
400	Commercial
401	Commercial
402	Commercial
403	Commercial
404	Open
405	Open
406	Residential
407	Residential
408	Open
409	Open
410	Open
411	Open
412	Open
413	Residential
414	Residential
415	Residential
416	Residential
417	Open
418	Open
419	Commercial
420	Commercial
421	Commercial
422	Residential
423	Residential
424	Commercial
425	Commercial
426	Commercial
427	Open
428	Residential
429	Residential
430	Residential
431	Residential
432	Open
433	Open
434	Residential
435	Open
436	Residential
437	Residential
438	Residential
439	Residential
440	Open
441	Open
442	Open
443	Open
444	Commercial
445	Commercial
446	Residential
447	Commercial
448	Commercial
449	Commercial
450	Commercial
451	Open
452	Residential
453	Residential
454	Residential
455	Residential
456	Open
457	Open
458	Residential
459	Open
460	Open
461	Residential
462	Residential
463	Open
464	Residential
465	Open
466	Residential
467	Residential
468	Residential
469	Commercial
470	Commercial
471	Commercial
472	Commercial
473	Commercial
474	Commercial
475	Commercial
476	Residential
477	Open
478	Residential
479	Residential
480	Open
481	Open
482	Open
483	Open
484	Commercial
485	Open
486	Residential
487	Open
488	Commercial
489	Open
490	Residential
491	Residential
492	Residential
493	Commercial
494	Residential
495	Residential
496	Residential
497	Residential
498	Commercial
499	Commercial
500	Residential
501	Open
502	Residential
503	Residential
504	Open
505	Open
506	Open
507	Open
508	Open
509	Residential
510	Residential
511	Commercial
512	Open
513	Open
514	Residential
515	Open
516	Residential
517	Residential
518	Commercial
519	Residential
520	Residential
521	Commercial
522	Commercial
523	Commercial
524	Commercial
525	Open
526	Open
527	Residential
528	Open
529	Residential
530	Commercial
531	Residential
532	Residential
533	Open
534	Open
535	Open
536	Residential
537	Residential
538	Residential
539	Residential
540	Residential
541	Residential
542	Commercial
543	Residential
544	Residential
545	Commercial
546	Commercial
547	Commercial
548	Open
549	Commercial
550	Open
551	Residential
552	Residential
553	Residential
554	Commercial
555	Residential
556	Residential
557	Open
558	Open
559	Residential
560	Residential
561	Residential
562	Residential
563	Residential
564	Residential
565	Residential
566	Residential
567	Residential
568	Residential
569	Commercial
570	Commercial
571	Commercial
572	Open
573	Commercial
574	Open
575	Residential
576	Open
577	Commercial
578	Commercial
579	Residential
580	Open
581	Open
582	Open
583	Open
584	Residential
585	Open
586	Residential
587	Residential
588	Residential
589	Residential
590	Residential
591	Commercial
592	Residential
593	Residential
594	Commercial
595	Open
596	Commercial
597	Open
598	Residential
599	Open
600	Open
601	Open
602	Residential
603	Open
604	Open
605	Open
606	Open
607	Open
608	Open
609	Open
610	Residential
611	Residential
612	Residential
613	Residential
614	Commercial
615	Commercial
616	Open
617	Residential
618	Commercial
619	Open
620	Commercial
621	Commercial
622	Commercial
623	Open
624	Open
625	Open
626	Open
627	Open
628	Residential
629	Open
630	Open
631	Open
632	Residential
633	Residential
634	Residential
635	Residential
636	Residential
637	Residential
638	Residential
639	Residential
640	Commercial
641	Residential
642	Commercial
643	Commercial
644	Commercial
645	Commercial
646	Commercial
647	Residential
648	Open
649	Open
650	Residential
651	Open
652	Open
653	Residential
654	Open
655	Residential
656	Residential
657	Residential
658	Residential
659	Residential
660	Residential
661	Residential
662	Residential
663	Residential
664	Commercial
665	Residential
666	Residential
667	Commercial
668	Commercial
669	Commercial
670	Commercial
671	Residential
672	Open
673	Open
674	Residential
675	Residential
676	Residential
677	Residential
678	Residential
679	Open
680	Residential
681	Residential
682	Residential
683	Residential
684	Residential
685	Residential
686	Residential
687	Commercial
688	Commercial
689	Commercial
690	Commercial
691	Open
692	Residential
693	Commercial
694	Commercial
695	Residential
696	Open
697	Open
698	Residential
699	Residential
700	Open
701	Residential
702	Residential
703	Residential
704	Residential
705	Residential
706	Residential
707	Residential
708	Residential
709	Residential
710	Commercial
711	Commercial
712	Residential
713	Residential
714	Commercial
715	Commercial
716	Commercial
717	Commercial
718	Commercial
719	Open
720	Open
721	Open
722	Open
723	Residential
724	Residential
725	Residential
726	Residential
727	Residential
728	Residential
729	Residential
730	Residential
731	Residential
732	Commercial
733	Commercial
734	Commercial
735	Residential
736	Residential
737	Residential
738	Commercial
739	Commercial
740	Commercial
741	Residential
742	Residential
743	Commercial
744	Open
745	Open
746	Open
747	Residential
748	Residential
749	Residential
750	Residential
751	Residential
752	Residential
753	Residential
754	Commercial
755	Open
756	Residential
757	Residential
758	Residential
759	Residential
760	Residential
761	Residential
762	Commercial
763	Residential
764	Residential
765	Residential
766	Residential
767	Commercial
768	Open
769	Open
770	Open
771	Open
772	Open
773	Open
774	Open
775	Open
776	Residential
777	Residential
778	Open
779	Open
780	Residential
781	Open
782	Residential
783	Residential
784	Residential
785	Residential
786	Residential
787	Residential
788	Residential
789	Residential
790	Residential
791	Open
792	Open
793	Open
794	Residential
795	Open
796	Open
797	Open
798	Residential
799	Residential
800	Residential
801	Residential
802	Residential
803	Open
804	Residential
805	Residential
806	Residential
807	Residential
808	Residential
809	Residential
810	Residential
811	Residential
812	Residential
813	Residential
814	Residential
815	Residential
816	Open
817	Open
818	Residential
819	Open
820	Open
821	Open
822	Open
823	Residential
824	Residential
825	Residential
826	Residential
827	Open
828	Open
829	Open
830	Open
831	Open
832	Open
833	Open
834	Residential
835	Residential
836	Residential
837	Residential
838	Residential
839	Residential
840	Open
841	Open
842	Residential
843	Open
844	Open
845	Open
846	Residential
847	Open
848	Residential
849	Open
850	Open
851	Open
852	Open
853	Open
854	Residential
855	Open
856	Open
857	Open
858	Residential
859	Residential
860	Open
861	Residential
862	Residential
863	Residential
864	Open
865	Open
866	Open
867	Open
868	Open
869	Open
870	Open
871	Open
872	Open
873	Open
874	Open
875	Open
876	Open
877	Open
878	Open
879	Open
880	Open
881	Open
882	Open
883	Residential
884	Residential
885	Residential
886	Open
887	Open
888	Open
889	Open
890	Open
891	Open
892	Open
893	Open
894	Open
895	Open
896	Open
897	Open
898	Open
899	Open
900	Open
901	Open
902	Open
903	Open
904	Open
905	Residential
906	Residential
907	Residential
908	Residential
909	Open
910	Open
911	Open
912	Open
913	Open
914	Residential
915	Open
916	Open
917	Open
918	Open
919	Open
920	Open
921	Open
922	Open
923	Open
924	Open
925	Open
926	Open
927	Open
928	Residential
929	Residential
930	Residential
931	Residential
932	Open
933	Residential
934	Open
935	Open
936	Residential
937	Open
938	Residential
939	Residential
940	Residential
941	Open
942	Open
943	Open
944	Open
945	Open
946	Open
947	Open
948	Open
949	Open
950	Open
951	Open
952	Open
953	Open
954	Open
955	Open
956	Residential
957	Open
958	Commercial
959	Open
