# Supplementary material for: Spatial estimation of air PM 2.5 emissions using activity data, local emission factors and land cover derived from satellite imagery
Source: Copernicus journal article supplement (doi:10.5194/amt-10-3313-2017), 2017-09-11
Supplement: Supplementary file 2 [file Data attachment - Emission table for GIS mapping (CabFuelstable-v2).xls]

## Sheet: Sheet1
FID	CellX	CellY	EmisType	ElecComb	TransportType	KgPM10Elec	KgPM25Fuels	KgPM25MCTC	KgPM25PUV	KgPM25VehiclesComb	KgPM25RiceStraw	KgPM25AllFactors	Landmark
0	1	1	Open	Null	Null	0	0	0	0	0	0	0
1	1	2	Open	Null	Null	0	0	0	0	0	0	0
2	1	3	LPG	Electricity	Tricycle	28.726	0	0.00873392	0	0.00873392	0	0.00873392
3	1	4	LPG	Electricity	Tricycle	28.726	0	0.00873392	0	0.00873392	0	0.00873392
4	1	5	LPG	Electricity	Tricycle	28.726	0	0.00873392	0	0.00873392	0	0.00873392
5	1	6	Fuels	Null	Tricycle	0	0.517392	0.00873392	0	0.00873392	0	0.526125
6	1	7	River	Null	Null	0	0	0	0	0	0	0
7	1	8	River	Null	Null	0	0	0	0	0	0	0
8	1	9	River	Null	Null	0	0	0	0	0	0	0
9	1	10	River	Null	Null	0	0	0	0	0	0	0
10	1	11	River	Null	Null	0	0	0	0	0	0	0
11	1	12	Agri	Null	Null	0	0	0	0	0	0.00649793	0.00649793
12	1	13	Agri	Null	Null	0	0	0	0	0	0.00649793	0.00649793
13	1	14	Open	Null	Null	0	0	0	0	0	0	0
14	1	15	Open	Null	Null	0	0	0	0	0	0	0
15	1	16	Open	Null	Null	0	0	0	0	0	0	0
16	1	17	River	Null	Null	0	0	0	0	0	0	0
17	1	18	Agri	Null	Null	0	0	0	0	0	0	0
18	1	19	Agri	Null	Null	0	0	0	0	0	0.00649793	0.00649793
19	1	20	Agri	Null	Null	0	0	0	0	0	0.00649793	0.00649793
20	1	21	Agri	Null	Null	0	0	0	0	0	0.00649793	0.00649793
21	1	22	Agri	Null	Null	0	0	0	0	0	0.00649793	0.00649793
22	1	23	Agri	Null	Null	0	0	0	0	0	0.00649793	0.00649793
23	1	24	Agri	Null	Null	0	0	0	0	0	0.00649793	0.00649793
24	2	1	Open	Null	Null	0	0	0	0	0	0.00649793	0.00649793
25	2	2	Open	Null	Null	0	0	0	0	0	0	0
26	2	3	LPG	Electricity	Tricycle	28.726	0	0.00873392	0	0.00873392	0	0.00873392
27	2	4	LPG	Electricity	Tricycle	28.726	0	0.00873392	0	0.00873392	0	0.00873392
28	2	5	LPG	Electricity	Tricycle	28.726	0	0.00873392	0	0.00873392	0	0.00873392
29	2	6	LPG	Electricity	Tricycle	28.726	0	0.00873392	0	0.00873392	0	0.00873392
30	2	7	LPG	Electricity	Tricycle	28.726	0	0.00873392	0	0.00873392	0	0.00873392
31	2	8	Fuels	Null	Null	0	0.55988	0	0	0	0	0.55988
32	2	9	Electricity	Electricity	Tricycle	25.6406	0	0.0124137	0	0.0124137	0	0.0124137	School
33	2	10	Fuels	Null	Tricycle	0	0.0165748	8.46253e-05	0	7.08021e-05	0	0.0166594
34	2	11	Agri	Null	Null	0	0	0	0	0	0.00649793	0.00649793
35	2	12	Agri	Null	Null	0	0	0	0	0	0.00649793	0.00649793
36	2	13	Agri	Null	Null	0	0	0	0	0	0.00649793	0.00649793
37	2	14	Agri	Null	Null	0	0	0	0	0	0.00649793	0.00649793
38	2	15	Open	Null	Null	0	0	0	0	0	0	0
39	2	16	Open	Null	Null	0	0	0	0	0	0	0
40	2	17	River	Null	Null	0	0	0	0	0	0	0
41	2	18	Open	Null	Null	0	0	0	0	0	0	0
42	2	19	Agri	Null	Null	0	0	0	0	0	0.00649793	0.00649793
43	2	20	Agri	Null	Null	0	0	0	0	0	0.00649793	0.00649793
44	2	21	Agri	Null	Null	0	0	0	0	0	0.00649793	0.00649793
45	2	22	Agri	Null	Null	0	0	0	0	0	0.00649793	0.00649793
46	2	23	Agri	Null	Null	0	0	0	0	0	0.00649793	0.00649793
47	2	24	Open	Null	Null	0	0	0	0	0	0	0
48	3	1	Open	Null	Null	0	0	0	0	0	0	0
49	3	2	Open	Null	Null	0	0	0	0	0	0	0
50	3	3	Open	Null	Tricycle	0	0	0.00873392	0	0.00873392	0	0.00873392
51	3	4	Open	Null	Tricycle	0	0	0.00873392	0	0.00873392	0	0.00873392
52	3	5	Electricity	Electricity	Tricycle	28.726	0	0.00873392	0	0.00873392	0	0.00873392
53	3	6	LPG	Electricity	Tricycle	28.726	0	0.00873392	0	0.00873392	0	0.00873392
54	3	7	LPG	Electricity	Tricycle	28.726	0	0.00873392	0	0.00873392	0	0.00873392
55	3	8	LPG	Electricity	Tricycle	13.3966	0	0.00367807	0	0.00367807	0	0.00367807
56	3	9	LPG	Electricity	Tricycle	25.6406	0	0.0124137	0	0.0124137	0	0.0124137
57	3	10	Fuels	Electricity	Tricycle	25.6406	0.55988	0.0124137	0	0.0124137	0	0.572293
58	3	11	Fuels	Electricity	Tricycle	25.6406	0.55988	0.0124137	0	0.0124137	0	0.572293
59	3	12	Open	Null	Null	0	0	0	0	0	0	0
60	3	13	Agri	Null	Null	0	0	0	0	0	0.00649793	0.00649793
61	3	14	Agri	Null	Null	0	0	0	0	0	0.00649793	0.00649793
62	3	15	Agri	Null	Null	0	0	0	0	0	0.00649793	0.00649793
63	3	16	Agri	Null	Null	0	0	0	0	0	0.00649793	0.00649793
64	3	17	Agri	Null	Null	0	0	0	0	0	0.00649793	0.00649793
65	3	18	River	Null	Null	0	0	0	0	0	0	0
66	3	19	Agri	Null	Null	0	0	0	0	0	0.00649793	0.00649793
67	3	20	Agri	Null	Null	0	0	0	0	0	0.00649793	0.00649793
68	3	21	Agri	Null	Null	0	0	0	0	0	0.00649793	0.00649793
69	3	22	Agri	Null	Null	0	0	0	0	0	0.00649793	0.00649793
70	3	23	Agri	Null	Null	0	0	0	0	0	0.00649793	0.00649793
71	3	24	Agri	Null	Null	0	0	0	0	0	0.00816223	0.00816223
72	4	1	Open	Null	Null	0	0	0	0	0	0	0
73	4	2	Open	Null	Null	0	0	0	0	0	0	0
74	4	3	LPG	Electricity	Tricycle	28.726	0	0.00873392	0	0.00873392	0	0.00873392
75	4	4	Open	Null	Null	0	0	0	0	0	0	0
76	4	5	LPG	Electricity	Tricycle	28.726	0	0.00873392	0	0.00873392	0	0.00873392
77	4	6	LPG	Electricity	Tricycle	28.726	0	0.00873392	0	0.00873392	0	0.00873392
78	4	7	LPG	Electricity	Tricycle	13.3966	0	0.00367807	0	0.00367807	0	0.00367807
79	4	8	LPG	Electricity	Tricycle	13.3966	0	0.00367807	0	0.00367807	0	0.00367807
80	4	9	LPG	Electricity	Tricycle	13.3966	0	0.00367807	0	0.00367807	0	0.00367807
81	4	10	Open	Electricity	Tricycle	13.3966	0	0.00367807	0	0.00367807	0	0.00367807
82	4	11	LPG	Null	Tricycle	0	0	0.00367807	0	0.00367807	0	0.00367807
83	4	12	Open	Null	Tricycle	0	0	0.0124137	0	0.0124137	0	0.0124137
84	4	13	Fuels	Null	Tricycle	0	0.55988	0.0124137	0	0.0124137	0	0.572293
85	4	14	Agri	Null	Null	0	0	0	0	0	0.00649793	0.00649793
86	4	15	Agri	Null	Null	0	0	0	0	0	0.00649793	0.00649793
87	4	16	Agri	Null	Null	0	0	0	0	0	0.00649793	0.00649793
88	4	17	Agri	Null	Null	0	0	0	0	0	0.00649793	0.00649793
89	4	18	River	Null	Null	0	0	0	0	0	0	0
90	4	19	Agri	Null	Null	0	0	0	0	0	0.00649793	0.00649793
91	4	20	Agri	Null	Null	0	0	0	0	0	0.00649793	0.00649793
92	4	21	Agri	Null	Null	0	0	0	0	0	0.00649793	0.00649793
93	4	22	Agri	Null	Null	0	0	0	0	0	0.00649793	0.00649793
94	4	23	Agri	Null	Null	0	0	0	0	0	0.00816223	0.00816223
95	4	24	Open	Null	Null	0	0	0	0	0	0	0
96	5	1	Open	Null	Null	0	0	0	0	0	0	0
97	5	2	Open	Null	Null	0	0	0	0	0	0	0
98	5	3	Open	Null	Tricycle	0	0	0.00873392	0	0.00873392	0	0.00873392
99	5	4	Grilling	Null	Tricycle	0	0.0656711	0.00873392	0	0.00873392	0	0.074405
100	5	5	Open	Null	Tricycle	0	0	0.00873392	0	0.00873392	0	0.00873392
101	5	6	LPG	Electricity	Tricycle	28.726	0	0.00873392	0	0.00873392	0	0.00873392
102	5	7	LPG	Electricity	Tricycle	13.3966	0	0.00367807	0	0.00367807	0	0.00367807
103	5	8	LPG	Electricity	Tricycle	13.3966	0	0.00367807	0	0.00367807	0	0.00367807
104	5	9	LPG	Electricity	Tricycle	13.3966	0	0.00367807	0	0.00367807	0	0.00367807
105	5	10	Open	Null	Tricycle	0	0	0.00367807	0	0.00367807	0	0.00367807
106	5	11	LPG	Electricity	Tricycle	13.3966	0	0.00367807	0	0.00367807	0	0.00367807
107	5	12	LPG	Electricity	Tricycle	13.3966	0	0.00367807	0	0.00367807	0	0.00367807
108	5	13	Fuels	Null	Tricycle	0	0.55988	0.0124137	0	0.0124137	0	0.572293
109	5	14	Fuels	Null	Tricycle	0	0.55988	0.0124137	0	0.0124137	0	0.572293
110	5	15	Open	Null	Null	0	0	0	0	0	0	0
111	5	16	Agri	Null	Null	0	0	0	0	0	0.00649793	0.00649793
112	5	17	Agri	Null	Null	0	0	0	0	0	0.00649793	0.00649793
113	5	18	Agri	Null	Null	0	0	0	0	0	0.00649793	0.00649793
114	5	19	River	Null	Null	0	0	0	0	0	0	0
115	5	20	Agri	Null	Null	0	0	0	0	0	0.00649793	0.00649793
116	5	21	Agri	Null	Null	0	0	0	0	0	0.00649793	0.00649793
117	5	22	Agri	Null	Null	0	0	0	0	0	0.00649793	0.00649793
118	5	23	Open	Null	Null	0	0	0	0	0	0	0
119	5	24	Open	Null	Null	0	0	0	0	0	0	0
120	6	1	Electricity	Null	Tricycle	0	0	0.00873392	0	0.00873392	0	0.00873392
121	6	2	Open	Null	Tricycle	0	0	0.00873392	0	0.00873392	0	0.00873392
122	6	3	Open	Null	Tricycle	0	0	0.00873392	0	0.00873392	0	0.00873392
123	6	4	Open	Null	Tricycle	0	0	0.00873392	0	0.00873392	0	0.00873392
124	6	5	Open	Null	Null	0	0	0	0	0	0	0
125	6	6	Open	Null	Tricycle	0	0	0.00873392	0	0.00873392	0	0.00873392
126	6	7	LPG	Electricity	Tricycle	13.3966	0	0.00367807	0	0.00367807	0	0.00367807
127	6	8	LPG	Electricity	Tricycle	13.3966	0	0.00367807	0	0.00367807	0	0.00367807
128	6	9	LPG	Electricity	Tricycle	13.3966	0	0.00367807	0	0.00367807	0	0.00367807
129	6	10	Open	Null	Null	0	0	0	0	0	0	0
130	6	11	LPG	Electricity	Tricycle	13.3966	0	0.00367807	0	0.00367807	0	0.00367807
131	6	12	Open	Electricity	Tricycle	13.3966	0	0.00367807	0	0.00367807	0	0.00367807
132	6	13	LPG	Electricity	Tricycle	13.3966	0	0.00367807	0	0.00367807	0	0.00367807
133	6	14	Fuels	Null	Tricycle	0	2.37137	0.284345	0	0.284345	0	2.65571
134	6	15	Open	Null	Null	0	0	0	0	0	0	0
135	6	16	Agri	Null	Null	0	0	0	0	0	0	0
136	6	17	Agri	Null	Null	0	0	0	0	0	0.00649793	0.00649793
137	6	18	Agri	Null	Null	0	0	0	0	0	0.00649793	0.00649793
138	6	19	Agri	Null	Null	0	0	0	0	0	0.00649793	0.00649793
139	6	20	River	Null	Null	0	0	0	0	0	0	0
140	6	21	Open	Null	Null	0	0	0	0	0	0	0
141	6	22	Open	Null	Null	0	0	0	0	0	0	0
142	6	23	Open	Null	Null	0	0	0	0	0	0	0
143	6	24	River	Null	Null	0	0	0	0	0	0	0
144	7	1	Electricity	Electricity	Tricycle	28.726	0	0.00873392	0	0.00873392	0	0.00873392	City hall
145	7	2	Electricity	Electricity	Tricycle	28.726	0	0.00873392	0	0.00873392	0	0.00873392	City hall
146	7	3	Electricity	Electricity	Tricycle	28.726	0	0.00873392	0	0.00873392	0	0.00873392
147	7	4	LPG	Electricity	Tricycle	28.726	0	0.00873392	0	0.00873392	0	0.00873392
148	7	5	Open	Null	Null	0	0	0	0	0	0	0
149	7	6	Open	Null	Null	0	0	0	0	0	0	0
150	7	7	LPG	Null	Tricycle	0	0	0.00873392	0	0.00873392	0	0.00873392
151	7	8	LPG	Electricity	Tricycle	28.726	0	0.00873392	0	0.00873392	0	0.00873392
152	7	9	Open	Null	Tricycle	0	0	0.00367807	0	0.00367807	0	0.00367807
153	7	10	Open	Null	Tricycle	0	0	0.00367807	0	0.00367807	0	0.00367807
154	7	11	Electricity	Electricity	Tricycle	13.3966	0	0.00367807	0	0.00367807	0	0.00367807
155	7	12	LPG	Electricity	Tricycle	13.3966	0	0.00367807	0	0.00367807	0	0.00367807
156	7	13	Electricity	Null	Tricycle	0	0	0.00367807	0	0.00367807	0	0.00367807
157	7	14	LPG	Electricity	Tricycle	91.3152	0	0.284345	0	0.284345	0	0.284345
158	7	15	Fuels	Null	Tricycle	0	2.37137	0.284345	0	0.284345	0	2.65571
159	7	16	Open	Null	Null	0	0	0	0	0	0	0
160	7	17	Agri	Null	Null	0	0	0	0	0	0.00816223	0.00816223
161	7	18	Agri	Null	Null	0	0	0	0	0	0.00816223	0.00816223
162	7	19	Open	Null	Null	0	0	0	0	0	0	0
163	7	20	Open	Null	Null	0	0	0	0	0	0	0
164	7	21	River	Null	Null	0	0	0	0	0	0	0
165	7	22	River	Null	Null	0	0	0	0	0	0	0
166	7	23	River	Null	Null	0	0	0	0	0	0	0
167	7	24	Open	Null	Null	0	0	0	0	0	0	0
168	8	1	Open	Null	Tricycle	0	0	0.000230623	0	0.000230623	0	0.000230623
169	8	2	Open	Null	Tricycle	0	0	0.000230623	0	0.000230623	0	0.000230623
170	8	3	Open	Null	Tricycle	0	0	0.00873392	0	0.00873392	0	0.00873392
171	8	4	LPG	Electricity	Tricycle	28.726	0	0.00873392	0	0.00873392	0	0.00873392
172	8	5	Open	Null	Null	0	0	0	0	0	0	0
173	8	6	Cemetery	Null	Null	0	0	0	0	0	0	0
174	8	7	Cemetery	Null	Tricycle	0	0	0.00873392	0	0.00873392	0	0.00873392
175	8	8	LPG	Electricity	Tricycle	28.726	0	0.00873392	0	0.00873392	0	0.00873392
176	8	9	Open	Null	Null	0	0	0	0	0	0	0
177	8	10	Open	Null	Tricycle	0	0	0.0128518	0	0.0128518	0	0.0128518
178	8	11	Electricity	Electricity	Tricycle	13.3966	0	0.00367807	0	0.00367807	0	0.00367807
179	8	12	LPG	Electricity	Tricycle	13.3966	0	0.00367807	0	0.00367807	0	0.00367807
180	8	13	LPG	Electricity	Tricycle	13.3966	0	0.00367807	0	0.00367807	0	0.00367807
181	8	14	LPG	Electricity	Tricycle	13.3966	0	0.00367807	0	0.00367807	0	0.00367807
182	8	15	Fuels	Electricity	Tricycle	91.3152	2.37137	0.284345	0	0.284345	0	2.65571
183	8	16	Fuels	Null	Tricycle	0	2.37137	0.284345	0	0.284345	0	2.65571
184	8	17	Agri	Null	Null	0	0	0	0	0	0	0
185	8	18	Agri	Null	Null	0	0	0	0	0	0.00816223	0.00816223
186	8	19	Open	Null	Null	0	0	0	0	0	0	0
187	8	20	Open	Null	Null	0	0	0	0	0	0	0
188	8	21	Open	Null	Null	0	0	0	0	0	0	0
189	8	22	Open	Null	Null	0	0	0	0	0	0	0
190	8	23	Open	Null	Null	0	0	0	0	0	0	0
191	8	24	Open	Null	Null	0	0	0	0	0	0	0
192	9	1	LPG	Electricity	Tricycle	4.26058	0	0.000230623	0	0.000230623	0	0.000230623
193	9	2	LPG	Null	Tricycle	0	0	0.000230623	0	0.000230623	0	0.000230623
194	9	3	Open	Null	Tricycle	0	0	0.0063014	0	0.0063014	0	0.0063014
195	9	4	Fuels	Null	Null	0	0.517392	0	0	0	0	0.517392
196	9	5	Fuels	Null	Null	0	0.517392	0	0	0	0	0.517392
197	9	6	Open	Null	Tricycle	0	0	0.00873392	0	0.00873392	0	0.00873392
198	9	7	Cemetery	Null	Tricycle	0	0	0.00873392	0	0.00873392	0	0.00873392
199	9	8	Cemetery	Null	Tricycle	0	0	0.0128518	0	0.0128518	0	0.0128518
200	9	9	Open	Null	Null	0	0	0	0	0	0	0
201	9	10	Open	Null	Null	0	0	0	0	0	0	0
202	9	11	LPG	Electricity	Tricycle	13.3966	0	0.00367807	0	0.00367807	0	0.00367807
203	9	12	LPG	Electricity	Tricycle	13.3966	0	0.00367807	0	0.00367807	0	0.00367807
204	9	13	LPG	Electricity	Tricycle	13.3966	0	0.00367807	0	0.00367807	0	0.00367807
205	9	14	LPG	Electricity	Tricycle	13.3966	0	0.00367807	0	0.00367807	0	0.00367807
206	9	15	LPG	Electricity	Tricycle	91.3152	0	0.284345	0	0.284345	0	0.284345
207	9	16	LPG	Electricity	Tricycle	91.3152	0	0.284345	0	0.284345	0	0.284345
208	9	17	Fuels	Null	Null	0	2.37137	0	0	0	0	2.37137
209	9	18	Agri	Null	Null	0	0	0	0	0	0.00816223	0.00816223
210	9	19	Agri	Null	Null	0	0	0	0	0	0.00816223	0.00816223
211	9	20	Agri	Null	Null	0	0	0	0	0	0.00816223	0.00816223
212	9	21	Open	Null	Null	0	0	0	0	0	0	0
213	9	22	Open	Null	Null	0	0	0	0	0	0	0
214	9	23	Agri	Null	Null	0	0	0	0	0	0.00816223	0.00816223
215	9	24	Agri	Null	Null	0	0	0	0	0	0.00816223	0.00816223
216	10	1	Electricity	Electricity	Tricycle;Jeepney;Bus	4.26058	0	0.000230623	0.00723715	0.0074301	0	0.00746778	Circumferential intersection
217	10	2	Electricity	Electricity	Tricycle	25.3056	0	0.0063014	0	0.0063014	0	0.0063014
218	10	3	LPG	Null	Tricycle	0	0	0.0063014	0	0.0063014	0	0.0063014
219	10	4	Fuels	Null	Null	0	0.428892	0	0	0	0	0.428892
220	10	5	Cemetery	Null	Null	0	0	0	0	0	0	0
221	10	6	Cemetery	Null	Null	0	0	0	0	0	0	0
222	10	7	Cemetery	Null	Tricycle	0	0	0.00873392	0	0.00873392	0	0.00873392
223	10	8	Open	Null	Tricycle	0	0	0.0128518	0	0.0128518	0	0.0128518
224	10	9	Open	Null	Null	0	0	0	0	0	0	0
225	10	10	Open	Null	Tricycle	0	0	0.0128518	0	0.0128518	0	0.0128518
226	10	11	LPG	Electricity	Tricycle	13.3966	0	0.00367807	0	0.00367807	0	0.00367807
227	10	12	LPG	Electricity	Tricycle	13.3966	0	0.00367807	0	0.00367807	0	0.00367807
228	10	13	LPG	Electricity	Tricycle	13.3966	0	0.00367807	0	0.00367807	0	0.00367807
229	10	14	LPG	Electricity	Tricycle	13.3966	0	0.00367807	0	0.00367807	0	0.00367807
230	10	15	Open	Null	Tricycle	0	0	0.00367807	0	0.00367807	0	0.00367807
231	10	16	LPG	Electricity	Tricycle	91.3152	0	0.284345	0	0.284345	0	0.284345
232	10	17	Fuels	Electricity	Tricycle	91.3152	2.37137	0.284345	0	0.284345	0	2.65571
233	10	18	Agri	Null	Null	0	0	0	0	0	0	0
234	10	19	Agri	Null	Null	0	0	0	0	0	0.00816223	0.00816223
235	10	20	Agri	Null	Null	0	0	0	0	0	0.00816223	0.00816223
236	10	21	Agri	Null	Null	0	0	0	0	0	0.00816223	0.00816223
237	10	22	Agri	Null	Tricycle	0	0	0.00105825	0	0.00105825	0.00816223	0.00922048
238	10	23	Agri	Null	Null	0	0	0	0	0	0.00816223	0.00816223
239	10	24	Agri	Null	Null	0	0	0	0	0	0.00816223	0.00816223
240	11	1	Electricity	Electricity	Tricycle;Jeepney;Bus	4.26058	0	0.000230623	0	0.000230623	0	0.000230623
241	11	2	Open	Null	Tricycle;Jeepney;Bus	0	0	0.0063014	0.00723715	0.0125093	0	0.0135386
242	11	3	Open	Null	Tricycle;Jeepney;Bus	0	0	0.0063014	0.00723715	0.0125093	0	0.0135386
243	11	4	Fuels	Null	Tricycle;Jeepney;Bus	0	0.428892	0.0063014	0	0.0063014	0	0.435193
244	11	5	Cemetery	Null	Null	0	0	0	0	0	0	0
245	11	6	Cemetery	Null	Null	0	0	0	0	0	0	0
246	11	7	Cemetery	Null	Tricycle	0	0	0.00873392	0	0.00873392	0	0.00873392
247	11	8	Open	Null	Null	0	0	0	0	0	0	0
248	11	9	Open	Null	Null	0	0	0	0	0	0	0
249	11	10	LPG	Electricity	Tricycle	13.4636	0	0.0128518	0	0.0128518	0	0.0128518
250	11	11	LPG	Electricity	Tricycle	13.3966	0	0.00367807	0	0.00367807	0	0.00367807
251	11	12	LPG	Electricity	Tricycle	13.3966	0	0.00367807	0	0.00367807	0	0.00367807
252	11	13	Electricity	Electricity	Tricycle	13.3966	0	0.00367807	0	0.00367807	0	0.00367807
253	11	14	LPG	Electricity	Tricycle	13.3966	0	0.00367807	0	0.00367807	0	0.00367807
254	11	15	LPG	Electricity	Tricycle	13.3966	0	0.00367807	0	0.00367807	0	0.00367807
255	11	16	LPG	Electricity	Tricycle	13.3966	0	0.00367807	0	0.00367807	0	0.00367807
256	11	17	LPG	Electricity	Tricycle	91.3152	0	0.284345	0	0.284345	0	0.284345
257	11	18	Fuels	Null	Null	0	2.37137	0	0	0	0	2.37137
258	11	19	Agri	Null	Null	0	0	0	0	0	0	0
259	11	20	Agri	Null	Null	0	0	0	0	0	0.00816223	0.00816223
260	11	21	Agri	Null	Null	0	0	0	0	0	0.00816223	0.00816223
261	11	22	Open	Null	Null	0	0	0	0	0	0	0
262	11	23	Agri	Null	Tricycle	0	0	0.00105825	0	0.00105825	0.00816223	0.00922048
263	11	24	Agri	Null	Tricycle	0	0	0.00105825	0	0.00105825	0.00816223	0.00922048
264	12	1	Open	Null	Null	0	0	0	0	0	0	0
265	12	2	LPG	Electricity	Tricycle	25.3056	0	0.0063014	0	0.0063014	0	0.0063014
266	12	3	LPG	Electricity	Tricycle	25.3056	0	0.0063014	0	0.0063014	0	0.0063014
267	12	4	Electricity	Electricity	Tricycle;Jeepney;Bus	25.3056	0	0.0063014	0.00723715	0.0125093	0	0.0135386
268	12	5	Cemetery	Null	Tricycle;Jeepney;Bus	0	0	0.0063014	0.00723715	0.0125093	0	0.0135386
269	12	6	Cemetery	Null	Tricycle;Jeepney;Bus	0	0	0	0	0	0	0
270	12	7	Cemetery	Null	Tricycle	0	0	0.00873392	0	0.00873392	0	0.00873392
271	12	8	Open	Null	Tricycle	0	0	0.0128518	0	0.0128518	0	0.0128518
272	12	9	Electricity	Electricity	Tricycle	13.4636	0	0.0128518	0	0.0128518	0	0.0128518
273	12	10	Open	Electricity	Tricycle	13.4636	0	0.0128518	0	0.0128518	0	0.0128518
274	12	11	LPG	Electricity	Tricycle	13.3966	0	0.00367807	0	0.00367807	0	0.00367807
275	12	12	LPG	Electricity	Tricycle	13.3966	0	0.00367807	0	0.00367807	0	0.00367807
276	12	13	LPG	Electricity	Tricycle	13.3966	0	0.00367807	0	0.00367807	0	0.00367807
277	12	14	LPG	Electricity	Tricycle	13.3966	0	0.00367807	0	0.00367807	0	0.00367807
278	12	15	LPG	Electricity	Tricycle	13.3966	0	0.00367807	0	0.00367807	0	0.00367807
279	12	16	LPG	Electricity	Tricycle	91.3152	0	0.284345	0	0.284345	0	0.284345
280	12	17	LPG	Electricity	Tricycle	91.3152	0	0.284345	0	0.284345	0	0.284345
281	12	18	LPG	Electricity	Tricycle	91.3152	0	0.284345	0	0.284345	0	0.284345
282	12	19	Agri	Null	Null	0	0	0	0	0	0	0
283	12	20	Agri	Null	Null	0	0	0	0	0	0.00816223	0.00816223
284	12	21	Agri	Null	Null	0	0	0	0	0	0.00816223	0.00816223
285	12	22	Agri	Null	Null	0	0	0	0	0	0.00816223	0.00816223
286	12	23	Open	Null	Tricycle	0	0	0.00105825	0	0.00105825	0	0.00105825
287	12	24	LPG	Electricity	Tricycle	2.81502	0	0.000691489	0	0.000691489	0	0.000691489
288	13	1	Open	Null	Tricycle	0	0	2.42161	0	2.42161	0	2.42161
289	13	2	LPG	Electricity	Tricycle	169.24	0	2.42161	0	2.42161	0	2.42161
290	13	3	LPG	Electricity	Tricycle	18.4302	0	0.0027197	0	0.0027197	0	0.0027197
291	13	4	Fuels	Null	Null	0	0.428892	0	0	0	0	0.428892
292	13	5	LPG	Electricity	Tricycle	25.3056	0	0.0063014	0	0.0063014	0	0.0063014
293	13	6	Open	Electricity	Tricycle;Jeepney;Bus	63.3114	0	0.0847537	0.00723715	0.0781467	0	0.0919908
294	13	7	Open	Null	Tricycle;Jeepney;Bus	0	0	0.0128518	0.00723715	0.0179896	0	0.0200889
295	13	8	Open	Null	Tricycle;Jeepney;Bus	0	0	0.0128518	0.00723715	0.0179896	0	0.0200889
296	13	9	Open	Electricity	Tricycle	13.4636	0	0.0128518	0	0.0128518	0	0.0128518
297	13	10	LPG	Electricity	Tricycle	13.4636	0	0.0128518	0	0.0128518	0	0.0128518
298	13	11	LPG	Electricity	Tricycle	13.4636	0	0	0	0	0	0
299	13	12	LPG	Electricity	Tricycle	13.3966	0	0.00367807	0	0.00367807	0	0.00367807
300	13	13	LPG	Electricity	Tricycle	13.3966	0	0.00367807	0	0.00367807	0	0.00367807
301	13	14	LPG	Electricity	Tricycle	58.2898	0	0.206169	0	0.206169	0	0.206169
302	13	15	LPG	Electricity	Tricycle	58.2898	0	0.206169	0	0.206169	0	0.206169
303	13	16	Fuels	Null	Tricycle	0	1.31533	0.206169	0	0.206169	0	1.5215
304	13	17	Fuels	Null	Null	0	1.31533	0	0	0	0	1.31533
305	13	18	Electricity	Null	Tricycle	0	0	0.206169	0	0.206169	0	0.206169
306	13	19	Fuels	Null	Null	0	1.74621	0	0	0	0	1.74621
307	13	20	Open	Null	Tricycle	0	0	0.397283	0	0.397283	0	0.397283
308	13	21	Open	Null	Null	0	0	0	0	0	0	0
309	13	22	Agri	Null	Null	0	0	0	0	0	0.00816223	0.00816223
310	13	23	Agri	Null	Tricycle	0	0	0.000691489	0	0.000691489	0.68979	0.690481
311	13	24	Agri	Null	Tricycle	0	0	0.000691489	0	0.000691489	0.68979	0.690481
312	14	1	LPG	Electricity	Tricycle	169.24	0	2.42161	0	2.42161	0	2.42161
313	14	2	LPG	Electricity	Tricycle	169.24	0	2.42161	0	2.42161	0	2.42161
314	14	3	LPG	Electricity	Tricycle	18.4302	0	0.0027197	0	0.0027197	0	0.0027197
315	14	4	Fuels	Null	Null	0	0.242049	0	0	0	0	0.242049
316	14	5	LPG	Electricity	Tricycle	18.4302	0	0.0027197	0	0.0027197	0	0.0027197
317	14	6	Electricity	Electricity	Null	63.3114	0	0	0	0	0	0
318	14	7	Electricity	Electricity	Null	63.3114	0	0	0	0	0	0	NIA
319	14	8	Open	Null	Tricycle;Jeepney;Bus	0	0	0.00817773	0	0.00817773	0	0.00817773
320	14	9	Open	Null	Tricycle;Jeepney;Bus	0	0	0.00817773	0.00723715	0.0140791	0	0.0154149
321	14	10	LPG	Electricity	Tricycle;Jeepney;Bus	13.4636	0	0.0128518	0.00723715	0.0179896	0	0.0200889
322	14	11	LPG	Electricity	Tricycle	13.4636	0	0.0128518	0	0.0128518	0	0.0128518
323	14	12	LPG	Electricity	Tricycle	13.3966	0	0.00367807	0	0.00367807	0	0.00367807
324	14	13	LPG	Electricity	Tricycle	13.4636	0	0.0128518	0	0.0128518	0	0.0128518
325	14	14	Open	Null	Tricycle	0	0	0.206169	0	0.206169	0	0.206169
326	14	15	Open	Null	Bus	0	0	0	0	0	0	0	Bus depot
327	14	16	Electricity	Null	Tricycle	0	0	0.206169	0	0.206169	0	0.206169
328	14	17	Open	Null	Tricycle	0	0	0.789656	0	0.660669	0	0.789656
329	14	18	Fuels	Null	Tricycle	0	1.74621	0.397283	0	0.397283	0	2.14349
330	14	19	Fuels	Null	Tricycle	0	1.74621	0.397283	0	0.397283	0	2.14349
331	14	20	Open	Null	Tricycle	0	0	0.397283	0	0.397283	0	0.397283
332	14	21	Open	Null	Tricycle	0	0	0.397283	0	0.397283	0	0.397283
333	14	22	Fuels	Null	Tricycle	0	0.078973	0.000691489	0	0.000691489	0	0.0796645
334	14	23	Fuels	Null	Tricycle	0	0.078973	0.000691489	0	0.000691489	0	0.0796645
335	14	24	Open	Null	Null	0	0	0	0	0	0	0
336	15	1	Agri	Null	Tricycle	0	0	0.0145491	0	0.0145491	0	0.0145491
337	15	2	LPG	Electricity	Tricycle	25.9622	0	0.0145491	0	0.0145491	0	0.0145491
338	15	3	LPG	Electricity	Tricycle	18.4302	0	0.0027197	0	0.0027197	0	0.0027197
339	15	4	LPG	Electricity	Null	18.4302	0	0	0	0	0	0
340	15	5	LPG	Electricity	Tricycle	18.4302	0	0.0027197	0	0.0027197	0	0.0027197
341	15	6	LPG	Electricity	Tricycle	63.3114	0	0.0847537	0	0.0847537	0	0.0847537
342	15	7	Electricity	Electricity	Null	63.3114	0	0	0	0	0	0
343	15	8	Open	Null	Null	0	0	0	0	0	0	0	NFA
344	15	9	Open	Null	Null	0	0	0	0	0	0	0	NFA
345	15	10	Electricity	Electricity	Tricycle;Jeepney;Bus	40.2877	0	0.00817773	0	0.00817773	0	0.00817773	GSIS
346	15	11	Open	Null	Tricycle;Jeepney;Bus	0	0	0.00817773	0.00723715	0.0140791	0	0.0154149
347	15	12	Electricity	Electricity	Tricycle;Jeepney;Bus	13.4636	0	0.0128518	0.00723715	0.0179896	0	0.0200889
348	15	13	Electricity	Null	Null	0	0	0	0	0	0	0
349	15	14	LPG	Electricity	Tricycle;Jeepney	58.2898	0	0.206169	0.00474059	0.206169	0	0.210909
350	15	15	LPG	Electricity	Tricycle;Jeepney	34.2912	0	1.20967	0.0213795	1.01207	0	1.23105
351	15	16	Electricity	Electricity	Tricycle;Jeepney	62.7553	0	0	0.00677686	0	0	0.00677686
352	15	17	Open	Null	Tricycle	0	0	1.20967	0	1.01207	0	1.20967
353	15	18	LPG	Null	Tricycle	0	0	0.789656	0	0.660669	0	0.789656
354	15	19	LPG	Null	Tricycle	0	0	0.397283	0	0.397283	0	0.397283
355	15	20	Open	Null	Null	0	0	0	0	0	0	0
356	15	21	Open	Null	Tricycle	0	0	0.85939	0	0.85939	0	0.85939
357	15	22	Agri	Null	Null	0	0	0	0	0	0.68979	0.68979
358	15	23	Open	Null	Null	0	0	0	0	0	0	0
359	15	24	Open	Null	Null	0	0	0	0	0	0	0
360	16	1	Agri	Null	Null	0	0	0	0	0	0	0
361	16	2	Agri	Null	Null	0	0	0	0	0	0	0
362	16	3	LPG	Electricity	Tricycle	25.9622	0	0.0145491	0	0.0145491	0	0.0145491
363	16	4	LPG	Electricity	Tricycle	18.4302	0	0.0027197	0	0.0027197	0	0.0027197
364	16	5	Fuels	Null	Tricycle	0	1.41087	0.0847537	0	0.0847537	0	1.49562
365	16	6	Electricity	Electricity	Tricycle	63.3114	0	0.0847537	0	0.0847537	0	0.0847537
366	16	7	LPG	Electricity	Tricycle	63.3114	0	0.0847537	0	0.0847537	0	0.0847537
367	16	8	Open	Null	Tricycle	0	0	0.00817773	0	0.00817773	0	0.00817773
368	16	9	Open	Null	Null	0	0	0	0	0	0	0
369	16	10	Open	Null	Null	0	0	0	0	0	0	0
370	16	11	Agri	Null	Null	0	0	0	0	0	0	0
371	16	12	Electricity	Electricity	Tricycle;Jeepney;Bus	69.9029	0	0.0643677	0.00723715	0.0610907	0	0.0716048
372	16	13	Open	Null	Tricycle;Jeepney	0	0	0.510126	0.00734238	0.426799	0	0.517468	108SQ ref col 3 1
373	16	14	LPG	Electricity	Null	62.7553	0	0	0	0	0	0
374	16	15	Open	Null	Tricycle	0	0	0.307781	0	0.307781	0	0.307781
375	16	16	Open	Null	Null	0	0	0	0	0	0	0
376	16	17	Electricity	Null	Tricycle;Jeepney	0	0	1.20967	0.0213795	1.01207	0	1.23105
377	16	18	Electricity	Electricity	Tricycle	79.5531	0	0.789656	0	0.660669	0	0.789656
378	16	19	LPG	Electricity	Tricycle	86.7445	0	0.85939	0	0.85939	0	0.85939
379	16	20	Grilling	Null	Tricycle	0	2.23488	0.85939	0	0.85939	0	3.09427
380	16	21	Fuels	Null	Tricycle	0	2.9951	0.85939	0	0.85939	0	3.85449
381	16	22	Open	Null	Null	0	0	0	0	0	0	0
382	16	23	Open	Null	Null	0	0	0	0	0	0	0
383	16	24	Open	Null	Null	0	0	0	0	0	0	0
384	17	1	Agri	Null	Null	0	0	0	0	0	0	0
385	17	2	Agri	Null	Null	0	0	0	0	0	0	0
386	17	3	Agri	Null	Null	0	0	0	0	0	0	0
387	17	4	Open	Null	Tricycle	0	0	0.0027197	0	0.0027197	0	0.0027197
388	17	5	LPG	Electricity	Tricycle	63.3114	0	0.0847537	0	0.0847537	0	0.0847537
389	17	6	LPG	Electricity	Tricycle	63.3114	0	0.0847537	0	0.0847537	0	0.0847537
390	17	7	LPG	Electricity	Tricycle	63.3114	0	0.0847537	0	0.0847537	0	0.0847537
391	17	8	LPG	Electricity	Tricycle	40.2877	0	0.00817773	0	0.00817773	0	0.00817773
392	17	9	Open	Null	Null	0	0	0	0	0	0	0
393	17	10	Agri	Null	Null	0	0	0	0	0	0	0
394	17	11	Electricity	Electricity	Tricycle	69.9029	0	0.0643677	0	0.0643677	0	0.0643677
395	17	12	Open	Null	Tricycle	0	0	0.0643677	0	0.0643677	0	0.0643677
396	17	13	Electricity	Electricity	Tricycle;Jeepney;Bus	80.6124	0	0.510126	0.00723715	0.434036	0	0.517363	108SQ ref col 4 1
397	17	14	LPG	Electricity	Null	62.7553	0	0	0	0	0	0
398	17	15	LPG	Electricity	Tricycle	62.7553	0	0.307781	0	0.307781	0	0.307781
399	17	16	LPG	Electricity	Tricycle	62.7553	0	0.307781	0	0.307781	0	0.307781
400	17	17	Electricity	Electricity	Tricycle;Jeepney	62.7553	0	0.307781	0.00677686	0.307781	0	0.314558
401	17	18	Electricity	Electricity	Tricycle	7.02195	0	0.0667135	0	0.0667135	0	0.0667135
402	17	19	Electricity	Electricity	Tricycle	7.02195	0	0.0667135	0	0.0667135	0	0.0667135
403	17	20	Electricity	Electricity	Tricycle	86.7445	0	0.85939	0	0.85939	0	0.85939
404	17	21	Open	Null	Null	0	0	0	0	0	0	0
405	17	22	Open	Null	Null	0	0	0	0	0	0	0
406	17	23	LPG	Null	Null	0	0	0	0	0	0	0
407	17	24	LPG	Electricity	Tricycle	61.6014	0	0.0471208	0	0.0471208	0	0.0471208
408	18	1	Agri	Null	Null	0	0	0	0	0	0	0
409	18	2	Agri	Null	Null	0	0	0	0	0	0	0
410	18	3	Agri	Null	Tricycle	0	0	0.0145491	0	0.0145491	0	0.0145491
411	18	4	Open	Null	Tricycle	0	0	0.0145491	0	0.0145491	0	0.0145491
412	18	5	Open	Null	Tricycle	0	0	0.0847537	0	0.0847537	0	0.0847537
413	18	6	LPG	Electricity	Tricycle	63.3114	0	0.0847537	0	0.0847537	0	0.0847537
414	18	7	LPG	Electricity	Tricycle	25.9622	0	0.0145491	0	0.0145491	0	0.0145491
415	18	8	LPG	Electricity	Tricycle	40.2877	0	0.00817773	0	0.00817773	0	0.00817773
416	18	9	LPG	Electricity	Tricycle	40.2877	0	0.00817773	0	0.00817773	0	0.00817773
417	18	10	Open	Null	Null	0	0	0	0	0	0	0
418	18	11	Open	Null	Null	0	0	0	0	0	0	0
419	18	12	Electricity	Electricity	Null	69.9029	0	0	0	0	0	0
420	18	13	Electricity	Electricity	Tricycle;Jeepney;Bus	62.7553	0	0.307781	0.00723715	0.264743	0	0.315018	108SQ ref col 5 1
421	18	14	Electricity	Electricity	Null	62.7553	0	0	0	0	0	0
422	18	15	LPG	Electricity	Tricycle;Jeepney	33.5602	0	0.0873911	0.0041312	0.0873911	0	0.0915223
423	18	16	LPG	Electricity	Tricycle;Jeepney	62.7553	0	0.307781	0.00677686	0.307781	0	0.314558
424	18	17	Electricity	Electricity	Tricycle;Jeepney	62.7553	0	0.307781	0.00677686	0.307781	0	0.314558
425	18	18	Electricity	Electricity	Tricycle	7.02195	0	0.0667135	0	0.0667135	0	0.0667135	Public Market
426	18	19	Electricity	Electricity	Tricycle	7.02195	0	0.0667135	0	0.0667135	0	0.0667135
427	18	20	Open	Null	Tricycle	0	0	0.85939	0	0.85939	0	0.85939	Plaza Lucero
428	18	21	Fuels	Null	Tricycle	0	2.9951	0.85939	0	0.85939	0	3.85449
429	18	22	Fuels	Null	Tricycle	0	1.3389	0.0471208	0	0.0471208	0	1.38602
430	18	23	LPG	Electricity	Tricycle	61.6014	0	0.0471208	0	0.0471208	0	0.0471208
431	18	24	LPG	Electricity	Tricycle	61.6014	0	0.0471208	0	0.0471208	0	0.0471208
432	19	1	Open	Null	Null	0	0	0	0	0	0	0
433	19	2	Open	Null	Null	0	0	0	0	0	0	0
434	19	3	LPG	Electricity	Tricycle	25.9622	0	0.0145491	0	0.0145491	0	0.0145491
435	19	4	Open	Null	Tricycle	0	0	0.0145491	0	0.0145491	0	0.0145491
436	19	5	LPG	Electricity	Tricycle	25.9622	0	0.0145491	0	0.0145491	0	0.0145491
437	19	6	LPG	Electricity	Tricycle	25.9622	0	0.0145491	0	0.0145491	0	0.0145491
438	19	7	LPG	Electricity	Tricycle	25.9622	0	0.0145491	0	0.0145491	0	0.0145491
439	19	8	LPG	Electricity	Tricycle	40.2877	0	0.00817773	0	0.00817773	0	0.00817773
440	19	9	Open	Null	Null	0	0	0	0	0	0	0
441	19	10	Open	Null	Null	0	0	0	0	0	0	0
442	19	11	Open	Null	Null	0	0	0	0	0	0	0
443	19	12	Open	Null	Tricycle;Jeepney;Bus	0	0	0.0643677	0.00723715	0.0610907	0	0.0716048
444	19	13	Electricity	Electricity	Tricycle;Jeepney;Bus	69.9029	0	0.0643677	0.00723715	0.0610907	0	0.0716048	108SQ ref col 6 1
445	19	14	Electricity	Electricity	Tricycle;Jeepney;Bus	33.5602	0	0.0873911	0	0.0873911	0	0.0873911
446	19	15	LPG	Electricity	Null	33.5602	0	0	0	0	0	0
447	19	16	Electricity	Electricity	Tricycle;Jeepney	33.5602	0	0.0873911	0.0041312	0.0873911	0	0.0915223
448	19	17	Electricity	Electricity	Tricycle;Jeepney	33.5602	0	0.0873911	0.0041312	0.0873911	0	0.0915223
449	19	18	Electricity	Electricity	Tricycle;Jeepney	33.5602	0	0.0873911	0.0041312	0.0873911	0	0.0915223
450	19	19	Electricity	Electricity	Tricycle	7.02195	0	0.0667135	0	0.0667135	0	0.0667135
451	19	20	Open	Null	Tricycle	0	0	0.95709	0	0.95709	0	0.95709	Plaza Lucero
452	19	21	LPG	Null	Tricycle	0	0	0.641914	0	0.53706	0	0.641914
453	19	22	LPG	Null	Tricycle	0	0	0.0471208	0	0.0471208	0	0.0471208
454	19	23	LPG	Electricity	Tricycle	61.6014	0	0.0471208	0	0.0471208	0	0.0471208
455	19	24	LPG	Electricity	Tricycle	61.6014	0	0.0471208	0	0.0471208	0	0.0471208
456	20	1	Agri	Null	Null	0	0	0	0	0	0.734558	0.734558
457	20	2	Open	Null	Null	0	0	0	0	0	0	0
458	20	3	LPG	Electricity	Tricycle	25.9622	0	0.0145491	0	0.0145491	0	0.0145491
459	20	4	Open	Null	Tricycle	0	0	0.0145491	0	0.0145491	0	0.0145491
460	20	5	Open	Null	Tricycle	0	0	0.0145491	0	0.0145491	0	0.0145491
461	20	6	LPG	Electricity	Tricycle	25.9622	0	0.0145491	0	0.0145491	0	0.0145491
462	20	7	LPG	Electricity	Tricycle	25.9622	0	0.0145491	0	0.0145491	0	0.0145491
463	20	8	Open	Null	Null	0	0	0	0	0	0	0
464	20	9	LPG	Electricity	Null	40.2877	0	0	0	0	0	0
465	20	10	Open	Null	Tricycle;Jeepney;Bus	0	0	0.00817773	0	0.00817773	0	0.00817773
466	20	11	LPG	Electricity	Tricycle;Jeepney;Bus	40.2877	0	0.00817773	0.00723715	0.0140791	0	0.0154149
467	20	12	LPG	Electricity	Tricycle	69.9029	0	0.0643677	0	0.0643677	0	0.0643677
468	20	13	LPG	Electricity	Tricycle	69.9029	0	0.0643677	0	0.0643677	0	0.0643677	108SQ ref col 7 1
469	20	14	Electricity	Electricity	Tricycle;Jeepney;Bus	33.5602	0	0.0873911	0.00723715	0.0803533	0	0.0946282
470	20	15	Electricity	Electricity	Tricycle;Jeepney	33.5602	0	0.0873911	0.0041312	0.0873911	0	0.0915223
471	20	16	Electricity	Electricity	Tricycle	33.5602	0	0.0873911	0	0.0873911	0	0.0873911
472	20	17	Electricity	Electricity	Tricycle	33.5602	0	0.0873911	0	0.0873911	0	0.0873911
473	20	18	Electricity	Electricity	Tricycle	33.5602	0	0.0873911	0	0.0873911	0	0.0873911
474	20	19	Electricity	Electricity	Tricycle	126.784	0	0.95709	0	0.95709	0	0.95709
475	20	20	Grilling	Electricity	Tricycle	126.784	2.86962	0.95709	0	0.95709	0	3.82671	Burgos St. grilling
476	20	21	Fuels	Null	Tricycle	0	1.96871	0.641914	0	0.53706	0	2.61062
477	20	22	Open	Null	Null	0	0	0	0	0	0	0
478	20	23	LPG	Electricity	Tricycle	61.6014	0	0.0471208	0	0.0471208	0	0.0471208
479	20	24	LPG	Electricity	Tricycle	61.6014	0	0.0471208	0	0.0471208	0	0.0471208
480	21	1	Open	Electricity	Tricycle;Jeepney;Bus	1.54333	0	1.54324e-05	0.00723715	0.00725006	0	0.00725259
481	21	2	Open	Null	Tricycle;Jeepney;Bus	0	0	0.0145491	0	0.0145491	0	0.0145491
482	21	3	Open	Null	Null	0	0	0	0	0	0	0
483	21	4	Open	Null	Null	0	0	0	0	0	0	0
484	21	5	Electricity	Null	Tricycle	0	0	0.0145491	0	0.0145491	0	0.0145491
485	21	6	Open	Null	Tricycle	0	0	0.0145491	0	0.0145491	0	0.0145491
486	21	7	LPG	Electricity	Tricycle	25.9622	0	0.0145491	0	0.0145491	0	0.0145491
487	21	8	Open	Null	Null	0	0	0	0	0	0	0
488	21	9	Electricity	Electricity	Tricycle;Jeepney;Bus	40.2877	0	0.00817773	0.00723715	0.0140791	0	0.0154149
489	21	10	Open	Null	Tricycle;Jeepney;Bus	0	0	0.00817773	0.00723715	0.0140791	0	0.0154149
490	21	11	LPG	Electricity	Tricycle	40.2877	0	0.00817773	0	0.00817773	0	0.00817773
491	21	12	LPG	Electricity	Tricycle	40.2877	0	0.00817773	0	0.00817773	0	0.00817773
492	21	13	LPG	Electricity	Tricycle	69.9029	0	0.0643677	0	0.0643677	0	0.0643677	108SQ ref col 8 1
493	21	14	Electricity	Electricity	Tricycle;Jeepney;Bus	69.9029	0	0.0643677	0.00723715	0.0610907	0	0.0716048
494	21	15	LPG	Electricity	Tricycle	33.5602	0	0.0873911	0	0.0873911	0	0.0873911
495	21	16	LPG	Electricity	Tricycle	33.5602	0	0.0873911	0	0.0873911	0	0.0873911
496	21	17	LPG	Electricity	Tricycle	126.784	0	0.95709	0	0.95709	0	0.95709
497	21	18	LPG	Electricity	Tricycle	126.784	0	0.95709	0	0.95709	0	0.95709
498	21	19	Electricity	Electricity	Tricycle	54.3922	0	0.173213	0	0.173213	0	0.173213
499	21	20	Grilling	Electricity	Tricycle	53.0269	0.873	0.336491	0	0.281527	0	1.20949	Burgos St. grilling
500	21	21	LPG	Null	Tricycle	0	0	0.0242014	0	0.0242014	0	0.0242014
501	21	22	Open	Null	Tricycle	0	0	0.0242014	0	0.0242014	0	0.0242014
502	21	23	LPG	Electricity	Tricycle	61.6014	0	0.0471208	0	0.0471208	0	0.0471208
503	21	24	LPG	Electricity	Tricycle	61.6014	0	0.0471208	0	0.0471208	0	0.0471208
504	22	1	Open	Null	Null	0	0	0	0	0	0	0
505	22	2	Open	Null	Tricycle;Jeepney;Bus	0	0	0.0145491	0.00723715	0.0194097	0	0.0217862	Central Terminal
506	22	3	Open	Null	Tricycle;Jeepney;Bus	0	0	0.0145491	0.00723715	0.0194097	0	0.0217862
507	22	4	Open	Null	Tricycle;Jeepney;Bus	0	0	0.0145491	0.00723715	0.0194097	0	0.0217862
508	22	5	Open	Null	Tricycle;Jeepney;Bus	0	0	0.0145491	0.00723715	0.0194097	0	0.0217862
509	22	6	LPG	Electricity	Tricycle	25.9622	0	0.0145491	0	0.0145491	0	0.0145491
510	22	7	LPG	Electricity	Tricycle	25.9622	0	0.0145491	0	0.0145491	0	0.0145491
511	22	8	Electricity	Electricity	Tricycle;Jeepney;Bus	25.9622	0	0.0145491	0.00723715	0.0194097	0	0.0217862	LTO
512	22	9	Open	Null	Null	0	0	0	0	0	0	0
513	22	10	Open	Null	Tricycle	0	0	0.00817773	0	0.00817773	0	0.00817773
514	22	11	LPG	Electricity	Tricycle	40.2877	0	0.00817773	0	0.00817773	0	0.00817773
515	22	12	Open	Null	Tricycle	0	0	0.0643677	0	0.0643677	0	0.0643677
516	22	13	LPG	Electricity	Tricycle	69.9029	0	0.0643677	0	0.0643677	0	0.0643677	108SQ ref col 9 1
517	22	14	LPG	Electricity	Tricycle	54.5917	0	0.0714258	0	0.0714258	0	0.0714258
518	22	15	Electricity	Electricity	Tricycle;Jeepney;Bus	126.784	0	0.95709	0.00723715	0.807991	0	0.964327
519	22	16	LPG	Electricity	Tricycle	126.784	0	0.95709	0	0.95709	0	0.95709
520	22	17	LPG	Electricity	Tricycle	54.3922	0	0.173213	0	0.173213	0	0.173213
521	22	18	Electricity	Electricity	Tricycle	54.3922	0	0.173213	0	0.173213	0	0.173213	Megacenter
522	22	19	Electricity	Electricity	Tricycle	54.3922	0	0.173213	0	0.173213	0	0.173213	Megacenter
523	22	20	Electricity	Electricity	Tricycle	53.0269	0	0.336491	0	0.281527	0	0.336491
524	22	21	Electricity	Electricity	Tricycle	22.2935	0	0.0242014	0	0.0242014	0	0.0242014
525	22	22	Open	Null	Tricycle	0	0	0.0242014	0	0.0242014	0	0.0242014
526	22	23	Open	Null	Tricycle	0	0	0.0471208	0	0.0471208	0	0.0471208
527	22	24	LPG	Electricity	Tricycle	61.6014	0	0.0471208	0	0.0471208	0	0.0471208
528	23	1	Open	Null	Tricycle	0	0	1.54324e-05	0	1.54324e-05	0	1.54324e-05
529	23	2	LPG	Electricity	Tricycle;Jeepney;Bus	25.9622	0	0.0145491	0.00723715	0.0145491	0	0.0217862
530	23	3	Terminal	Electricity	Tricycle;Jeepney;Bus	25.9622	0	0.0145491	0.00723715	0.0145491	0	0.0217862	Central Terminal
531	23	4	LPG	Electricity	Null	25.9622	0	0	0	0	0	0
532	23	5	LPG	Electricity	Tricycle	25.9622	0	0.0145491	0	0.0145491	0	0.0145491
533	23	6	Open	Null	Tricycle;Jeepney;Bus	0	0	0.0145491	0.00723715	0.0194097	0	0.0217862
534	23	7	Open	Null	Tricycle;Jeepney;Bus	0	0	0.0145491	0.00723715	0.0194097	0	0.0217862
535	23	8	Open	Null	Null	0	0	0	0	0	0	0
536	23	9	LPG	Electricity	Tricycle	25.9622	0	0.0145491	0	0.0145491	0	0.0145491
537	23	10	LPG	Electricity	Tricycle	40.2877	0	0.00817773	0	0.00817773	0	0.00817773
538	23	11	LPG	Electricity	Tricycle	69.9029	0	0.0643677	0	0.0643677	0	0.0643677
539	23	12	LPG	Electricity	Tricycle	53.6719	0	0.271621	0	0.271621	0	0.271621
540	23	13	LPG	Electricity	Tricycle	54.5917	0	0.0714258	0	0.0714258	0	0.0714258	108SQ ref col 10 1
541	23	14	LPG	Electricity	Tricycle	54.5917	0	0.0714258	0	0.0714258	0	0.0714258
542	23	15	Electricity	Electricity	Tricycle;Jeepney;Bus	44.5459	0	0.743486	0.00723715	0.629278	0	0.750723
543	23	16	LPG	Electricity	Tricycle	44.5459	0	0.743486	0	0.743486	0	0.743486
544	23	17	LPG	Electricity	Tricycle	44.5459	0	0.743486	0	0.743486	0	0.743486
545	23	18	Electricity	Electricity	Tricycle	54.3922	0	0.173213	0	0.173213	0	0.173213	Megacenter
546	23	19	Electricity	Electricity	Tricycle	27.046	0	0.0590924	0	0.0590924	0	0.0590924	Megacenter
547	23	20	Electricity	Electricity	Tricycle	27.046	0	0.0590924	0	0.0590924	0	0.0590924
548	23	21	Open	Null	Tricycle	0	0	0.0242014	0	0.0242014	0	0.0242014	Freedom Park
549	23	22	Electricity	Electricity	Tricycle	22.2935	0	0.0242014	0	0.0242014	0	0.0242014
550	23	23	Open	Null	Null	0	0	0	0	0	0	0
551	23	24	LPG	Electricity	Tricycle	61.6014	0	0.0471208	0	0.0471208	0	0.0471208
552	24	1	LPG	Electricity	Tricycle	1.54333	0	1.54324e-05	0	1.54324e-05	0	1.54324e-05
553	24	2	LPG	Electricity	Tricycle;Jeepney	25.9622	0	0.0145491	0.00723715	0.0145491	0	0.0217862
554	24	3	Terminal	Electricity	Tricycle;Jeepney;Bus	25.9622	0	0.0145491	0.00723715	0.0145491	0	0.0217862	Central Terminal
555	24	4	LPG	Electricity	Null	25.9622	0	0	0	0	0	0
556	24	5	LPG	Electricity	Tricycle	25.9622	0	0.0145491	0	0.0145491	0	0.0145491
557	24	6	Open	Null	Tricycle	0	0	0.0145491	0	0.0145491	0	0.0145491
558	24	7	Open	Null	Tricycle	0	0	0.0145491	0	0.0145491	0	0.0145491
559	24	8	LPG	Electricity	Tricycle	25.9622	0	0.0145491	0	0.0145491	0	0.0145491
560	24	9	LPG	Electricity	Tricycle	25.9622	0	0.0145491	0	0.0145491	0	0.0145491
561	24	10	LPG	Electricity	Tricycle	53.6719	0	0.271621	0	0.271621	0	0.271621
562	24	11	LPG	Electricity	Tricycle	53.6719	0	0.271621	0	0.271621	0	0.271621
563	24	12	LPG	Electricity	Tricycle	53.6719	0	0.271621	0	0.271621	0	0.271621
564	24	13	LPG	Electricity	Tricycle	53.6719	0	0.271621	0	0.271621	0	0.271621	108SQ ref col 11 1
565	24	14	LPG	Electricity	Tricycle	54.5917	0	0.0714258	0	0.0714258	0	0.0714258
566	24	15	LPG	Electricity	Tricycle;Jeepney;Bus	54.5917	0	0.0714258	0.00723715	0.0669959	0	0.078663
567	24	16	LPG	Electricity	Tricycle	44.5459	0	0.743486	0	0.743486	0	0.743486
568	24	17	LPG	Electricity	Tricycle	44.5459	0	0.743486	0	0.743486	0	0.743486
569	24	18	Electricity	Electricity	Tricycle	27.046	0	0.0590924	0	0.0590924	0	0.0590924
570	24	19	Electricity	Electricity	Tricycle	27.046	0	0.0590924	0	0.0590924	0	0.0590924
571	24	20	Electricity	Electricity	Tricycle	27.046	0	0.0590924	0	0.0590924	0	0.0590924
572	24	21	Open	Null	Tricycle	0	0	0.0590924	0	0.0590924	0	0.0590924	Freedom Park
573	24	22	Electricity	Electricity	Tricycle	22.2935	0	0.0242014	0	0.0242014	0	0.0242014
574	24	23	Open	Null	Null	0	0	0	0	0	0	0
575	24	24	LPG	Electricity	Tricycle	61.6014	0	0.0471208	0	0.0471208	0	0.0471208
576	25	1	Open	Null	Null	0	0	0	0	0	0	0
577	25	2	Terminal	Electricity	Tricycle;Jeepney	25.9622	0	0.0145491	0.00215558	0.0145491	0	0.0167047	Central Terminal
578	25	3	Terminal	Electricity	Tricycle;Jeepney;Bus	25.9622	0	0.0145491	0.00215558	0.0145491	0	0.0167047	Central Terminal
579	25	4	LPG	Electricity	Tricycle	25.9622	0	0.0145491	0	0.0145491	0	0.0145491
580	25	5	Open	Null	Null	0	0	0	0	0	0	0
581	25	6	Open	Null	Null	0	0	0	0	0	0	0
582	25	7	Open	Null	Null	0	0	0	0	0	0	0
583	25	8	Agri	Null	Null	0	0	0	0	0	0	0
584	25	9	LPG	Electricity	Tricycle	43.6484	0	0.128852	0	0.107804	0	0.128852
585	25	10	Open	Null	Null	0	0	0	0	0	0	0
586	25	11	LPG	Electricity	Tricycle	53.6719	0	0.271621	0	0.271621	0	0.271621
587	25	12	LPG	Electricity	Tricycle	53.6719	0	0.271621	0	0.271621	0	0.271621
588	25	13	LPG	Electricity	Tricycle	53.6719	0	0.271621	0	0.271621	0	0.271621	108SQ ref col 12 1
589	25	14	LPG	Electricity	Tricycle	54.5917	0	0.0714258	0	0.0714258	0	0.0714258
590	25	15	LPG	Electricity	Tricycle	54.5917	0	0.0714258	0	0.0714258	0	0.0714258
591	25	16	Electricity	Electricity	Tricycle;Jeepney;Bus	44.5459	0	0.743486	0.00723715	0.629278	0	0.750723
592	25	17	LPG	Electricity	Tricycle	44.5459	0	0.743486	0	0.743486	0	0.743486
593	25	18	LPG	Electricity	Tricycle	27.046	0	0.0590924	0	0.0590924	0	0.0590924
594	25	19	Electricity	Electricity	Tricycle	27.046	0	0.0590924	0	0.0590924	0	0.0590924
595	25	20	Open	Null	Tricycle	0	0	0.0590924	0	0.0590924	0	0.0590924	Track oval
596	25	21	Electricity	Electricity	Tricycle	27.046	0	0.0590924	0	0.0590924	0	0.0590924
597	25	22	Open	Null	Tricycle	0	0	0.0242014	0	0.0242014	0	0.0242014	Tennis courts
598	25	23	LPG	Electricity	Null	22.2935	0	0	0	0	0	0
599	25	24	Open	Null	Tricycle	0	0	0.0471208	0	0.0471208	0	0.0471208
600	26	1	Open	Null	Null	0	0	0	0	0	0	0
601	26	2	Open	Null	Null	0	0	0	0	0	0	0
602	26	3	LPG	Electricity	Tricycle	25.9622	0	0.0145491	0	0.0145491	0	0.0145491
603	26	4	Open	Null	Tricycle	0	0	0	0	0	0	0
604	26	5	Open	Null	Null	0	0	0	0	0	0	0
605	26	6	Open	Null	Null	0	0	0	0	0	0	0
606	26	7	Agri	Null	Null	0	0	0	0	0	0	0
607	26	8	Agri	Null	Null	0	0	0	0	0	0	0
608	26	9	Open	Null	Null	0	0	0	0	0	0	0
609	26	10	Open	Null	Null	0	0	0	0	0	0	0
610	26	11	LPG	Electricity	Tricycle	53.6719	0	0.271621	0	0.271621	0	0.271621
611	26	12	LPG	Electricity	Tricycle	53.6719	0	0.271621	0	0.271621	0	0.271621
612	26	13	LPG	Electricity	Tricycle	53.6719	0	0.271621	0	0.271621	0	0.271621
613	26	14	Fuels	Electricity	Tricycle	54.5917	1.14625	0.0714258	0	0.0714258	0	1.21767
614	26	15	Electricity	Electricity	Tricycle	54.5917	0	0.0714258	0	0.0714258	0	0.0714258
615	26	16	Electricity	Electricity	Tricycle;Jeepney;Bus	54.5917	0	0.0714258	0.00723715	0.0669959	0	0.078663
616	26	17	Open	Null	Null	0	0	0	0	0	0	0
617	26	18	LPG	Electricity	Tricycle	27.046	0	0.0590924	0	0.0590924	0	0.0590924
618	26	19	Electricity	Electricity	Tricycle	27.046	0	0.0590924	0	0.0590924	0	0.0590924
619	26	20	Open	Null	Null	0	0	0	0	0	0	0	Track oval
620	26	21	Electricity	Electricity	Tricycle	27.046	0	0.0590924	0	0.0590924	0	0.0590924
621	26	22	Electricity	Electricity	Tricycle	27.046	0	0.0590924	0	0.0590924	0	0.0590924	PNP
622	26	23	Electricity	Electricity	Tricycle	59.4095	0	0.19202	0	0.19202	0	0.19202
623	26	24	Open	Null	Null	0	0	0	0	0	0	0
624	27	1	Agri	Null	Null	0	0	0	0	0	0.734558	0.734558
625	27	2	Open	Null	Null	0	0	0	0	0	0	0
626	27	3	Open	Null	Tricycle	0	0	0.107804	0	0.107804	0	0.107804
627	27	4	Open	Null	Tricycle	0	0	0.107804	0	0.107804	0	0.107804
628	27	5	LPG	Electricity	Tricycle	43.6484	0	0.107804	0	0.107804	0	0.107804
629	27	6	Open	Null	Tricycle	0	0	0.107804	0	0.107804	0	0.107804
630	27	7	Open	Null	Tricycle	0	0	0.107804	0	0.107804	0	0.107804
631	27	8	Open	Null	Null	0	0	0	0	0	0	0
632	27	9	LPG	Electricity	Tricycle	43.6484	0	0.107804	0	0.107804	0	0.107804
633	27	10	LPG	Electricity	Tricycle	43.6484	0	0.107804	0	0.107804	0	0.107804
634	27	11	LPG	Electricity	Tricycle	53.6719	0	0.271621	0	0.271621	0	0.271621
635	27	12	LPG	Electricity	Tricycle	53.6719	0	0.271621	0	0.271621	0	0.271621
636	27	13	LPG	Electricity	Tricycle	53.6719	0	0.271621	0	0.271621	0	0.271621
637	27	14	LPG	Electricity	Tricycle	53.6719	0	0.271621	0	0.271621	0	0.271621
638	27	15	LPG	Electricity	Tricycle	39.3796	0	0.0147535	0	0.0147535	0	0.0147535
639	27	16	LPG	Electricity	Tricycle	39.3796	0	0.0147535	0	0.0147535	0	0.0147535
640	27	17	Electricity	Null	Tricycle;Jeepney;Bus	0	0	0.0590924	0.00723715	0.0566771	0	0.0663296	(new) Waltermart
641	27	18	LPG	Electricity	Null	27.046	0	0	0	0	0	0
642	27	19	Electricity	Electricity	Tricycle	27.046	0	0.0590924	0	0.0590924	0	0.0590924
643	27	20	Electricity	Electricity	Tricycle	27.046	0	0.0590924	0	0.0590924	0	0.0590924	Hospital
644	27	21	Electricity	Electricity	Tricycle	27.046	0	0.0590924	0	0.0590924	0	0.0590924
645	27	22	Electricity	Electricity	Tricycle	27.046	0	0.0590924	0	0.0590924	0	0.0590924
646	27	23	Electricity	Electricity	Tricycle	59.4095	0	0.19202	0	0.19202	0	0.19202
647	27	24	LPG	Electricity	Null	59.4095	0	0	0	0	0	0
648	28	1	Agri	Null	Null	0	0	0	0	0	0.734558	0.734558
649	28	2	Open	Null	Null	0	0	0	0	0	0	0
650	28	3	LPG	Electricity	Tricycle	43.6484	0	0.107804	0	0.107804	0	0.107804
651	28	4	Open	Null	Tricycle	0	0	0.107804	0	0.107804	0	0.107804
652	28	5	Open	Null	Tricycle	0	0	0.107804	0	0.107804	0	0.107804
653	28	6	LPG	Electricity	Tricycle	43.6484	0	0.107804	0	0.107804	0	0.107804
654	28	7	Open	Null	Null	0	0	0	0	0	0	0
655	28	8	LPG	Electricity	Tricycle	43.6484	0	0.107804	0	0.107804	0	0.107804
656	28	9	LPG	Electricity	Tricycle	43.6484	0	0.107804	0	0.107804	0	0.107804
657	28	10	LPG	Electricity	Tricycle	21.0469	0	0.00768755	0	0.00768755	0	0.00768755
658	28	11	LPG	Electricity	Tricycle	39.3796	0	0.0147535	0	0.0147535	0	0.0147535
659	28	12	LPG	Electricity	Tricycle	39.3796	0	0.0147535	0	0.0147535	0	0.0147535
660	28	13	LPG	Electricity	Tricycle	39.3796	0	0.0147535	0	0.0147535	0	0.0147535
661	28	14	LPG	Electricity	Tricycle	39.3796	0	0.0147535	0	0.0147535	0	0.0147535
662	28	15	LPG	Electricity	Tricycle	39.3796	0	0.0147535	0	0.0147535	0	0.0147535
663	28	16	LPG	Electricity	Tricycle	39.3796	0	0.0147535	0	0.0147535	0	0.0147535
664	28	17	Electricity	Electricity	Tricycle;Jeepney;Bus	39.3796	0	0.0147535	0.00723715	0.0195807	0	0.0219906
665	28	18	LPG	Electricity	Tricycle	27.046	0	0.0590924	0	0.0590924	0	0.0590924
666	28	19	LPG	Electricity	Tricycle	27.046	0	0.0590924	0	0.0590924	0	0.0590924
667	28	20	Electricity	Electricity	Tricycle	27.046	0	0.0590924	0	0.0590924	0	0.0590924	PJG Hospital
668	28	21	Electricity	Electricity	Tricycle	27.046	0	0.0590924	0	0.0590924	0	0.0590924
669	28	22	Electricity	Electricity	Tricycle	27.046	0	0.0590924	0	0.0590924	0	0.0590924	Good Samaritan
670	28	23	Electricity	Electricity	Tricycle	59.4095	0	0.19202	0	0.19202	0	0.19202
671	28	24	LPG	Electricity	Tricycle	59.4095	0	0.19202	0	0.19202	0	0.19202
672	29	1	Open	Null	Null	0	0	0	0	0	0	0
673	29	2	Open	Null	Tricycle	0	0	0.107804	0	0.107804	0	0.107804
674	29	3	LPG	Electricity	Null	43.6484	0	0	0	0	0	0
675	29	4	LPG	Electricity	Tricycle	43.6484	0	0.107804	0	0.107804	0	0.107804
676	29	5	LPG	Electricity	Tricycle	43.6484	0	0.107804	0	0.107804	0	0.107804
677	29	6	LPG	Electricity	Tricycle	43.6484	0	0.107804	0	0.107804	0	0.107804
678	29	7	LPG	Electricity	Tricycle	43.6484	0	0.107804	0	0.107804	0	0.107804
679	29	8	Open	Null	Tricycle	0	0	0.00768755	0	0.00768755	0	0.00768755
680	29	9	LPG	Electricity	Tricycle	21.0469	0	0.00768755	0	0.00768755	0	0.00768755
681	29	10	LPG	Electricity	Tricycle	21.0469	0	0.00768755	0	0.00768755	0	0.00768755
682	29	11	LPG	Electricity	Tricycle	39.3796	0	0.0147535	0	0.0147535	0	0.0147535
683	29	12	LPG	Electricity	Tricycle	39.3796	0	0.0147535	0	0.0147535	0	0.0147535
684	29	13	LPG	Electricity	Tricycle	39.3796	0	0.0147535	0	0.0147535	0	0.0147535
685	29	14	LPG	Electricity	Tricycle	39.3796	0	0.0147535	0	0.0147535	0	0.0147535
686	29	15	LPG	Electricity	Tricycle	39.3796	0	0.0147535	0	0.0147535	0	0.0147535
687	29	16	Electricity	Electricity	Tricycle	15.1238	0	0.0231857	0	0.0231857	0	0.0231857	Wesleyan
688	29	17	Electricity	Electricity	Tricycle	15.1238	0	0.0231857	0	0.0231857	0	0.0231857	Wesleyan
689	29	18	Electricity	Electricity	Tricycle;Jeepney;Bus	24.8736	0	0.00648939	0.00723715	0.0126665	0	0.0137265
690	29	19	Electricity	Electricity	Tricycle	27.046	0	0.0590924	0	0.0590924	0	0.0590924
691	29	20	Open	Null	Tricycle	0	0	0.0590924	0	0.0590924	0	0.0590924
692	29	21	LPG	Electricity	Tricycle	27.046	0	0.0590924	0	0.0590924	0	0.0590924
693	29	22	Electricity	Electricity	Tricycle	27.046	0	0.0590924	0	0.0590924	0	0.0590924	Good Samaritan
694	29	23	Electricity	Electricity	Tricycle	27.046	0	0.0590924	0	0.0590924	0	0.0590924
695	29	24	LPG	Electricity	Tricycle	59.4095	0	0.19202	0	0.19202	0	0.19202
696	30	1	Open	Null	Null	0	0	0	0	0	0	0
697	30	2	Open	Electricity	Tricycle	43.6484	0	0.107804	0	0.107804	0	0.107804
698	30	3	LPG	Electricity	Null	43.6484	0	0	0	0	0	0
699	30	4	LPG	Electricity	Tricycle	43.6484	0	0.107804	0	0.107804	0	0.107804
700	30	5	Open	Electricity	Tricycle	43.6484	0	0.107804	0	0.107804	0	0.107804
701	30	6	LPG	Electricity	Tricycle	43.6484	0	0.107804	0	0.107804	0	0.107804
702	30	7	LPG	Electricity	Tricycle	21.0469	0	0.00768755	0	0.00768755	0	0.00768755
703	30	8	LPG	Electricity	Tricycle	21.0469	0	0.00768755	0	0.00768755	0	0.00768755
704	30	9	LPG	Electricity	Tricycle	21.0469	0	0.00768755	0	0.00768755	0	0.00768755
705	30	10	LPG	Electricity	Tricycle	21.0469	0	0.00768755	0	0.00768755	0	0.00768755
706	30	11	LPG	Null	Tricycle	0	0	0.00768755	0	0.00768755	0	0.00768755
707	30	12	LPG	Electricity	Tricycle	39.3796	0	0.0147535	0	0.0147535	0	0.0147535
708	30	13	LPG	Electricity	Tricycle	39.3796	0	0.0147535	0	0.0147535	0	0.0147535
709	30	14	LPG	Electricity	Tricycle	15.1238	0	0.0231857	0	0.0231857	0	0.0231857
710	30	15	Electricity	Electricity	Tricycle	15.1238	0	0.0231857	0	0.0231857	0	0.0231857	Wesleyan
711	30	16	Electricity	Electricity	Tricycle	15.1238	0	0.0231857	0	0.0231857	0	0.0231857	Wesleyan
712	30	17	LPG	Electricity	Tricycle	15.1238	0	0.0231857	0	0.0231857	0	0.0231857
713	30	18	LPG	Electricity	Tricycle	24.8736	0	0.00648939	0	0.00648939	0	0.00648939
714	30	19	Electricity	Electricity	Tricycle;Jeepney;Bus	24.8736	0	0.00648939	0.00723715	0.0126665	0	0.0137265
715	30	20	Electricity	Electricity	Tricycle;Jeepney;Bus	45.4795	0	0.104975	0.00723715	0.0950652	0	0.112212
716	30	21	Electricity	Electricity	Tricycle;Jeepney;Bus	45.4795	0	0.104975	0.00723715	0.0950652	0	0.112212
717	30	22	Electricity	Electricity	Tricycle;Jeepney;Bus	45.4795	0	0.104975	0.00723715	0.0950652	0	0.112212
718	30	23	Electricity	Electricity	Tricycle;Jeepney;Bus	21.5649	0	0.00475253	0.00723715	0.0112134	0	0.0119897
719	30	24	Open	Null	Tricycle;Jeepney;Bus	0	0	0.19202	0.00723715	0.167892	0	0.199257	Mega Shell
720	31	1	Open	Null	Null	0	0	0	0	0	0	0
721	31	2	Open	Electricity	Null	1.54333	0	0	0	0	0	0
722	31	3	Open	Null	Tricycle	0	0	0.107804	0	0.107804	0	0.107804
723	31	4	LPG	Electricity	Tricycle	21.0469	0	0.00768755	0	0.00768755	0	0.00768755
724	31	5	LPG	Electricity	Tricycle	21.0469	0	0.00768755	0	0.00768755	0	0.00768755
725	31	6	LPG	Electricity	Tricycle	21.0469	0	0.00768755	0	0.00768755	0	0.00768755
726	31	7	LPG	Electricity	Tricycle	21.0469	0	0.00768755	0	0.00768755	0	0.00768755
727	31	8	LPG	Electricity	Tricycle	21.0469	0	0.00768755	0	0.00768755	0	0.00768755
728	31	9	LPG	Electricity	Tricycle	21.0469	0	0.00768755	0	0.00768755	0	0.00768755
729	31	10	LPG	Electricity	Tricycle	21.0469	0	0.00768755	0	0.00768755	0	0.00768755
730	31	11	LPG	Electricity	Tricycle	21.0469	0	0.00768755	0	0.00768755	0	0.00768755
731	31	12	LPG	Electricity	Tricycle	15.1238	0	0.0231857	0	0.0231857	0	0.0231857
732	31	13	Electricity	Electricity	Tricycle	15.1238	0	0.0231857	0	0.0231857	0	0.0231857	Wesleyan
733	31	14	Electricity	Electricity	Tricycle	15.1238	0	0.0231857	0	0.0231857	0	0.0231857	Wesleyan
734	31	15	Electricity	Electricity	Tricycle	15.1238	0	0.0231857	0	0.0231857	0	0.0231857	Wesleyan
735	31	16	LPG	Electricity	Tricycle	15.1238	0	0.0231857	0	0.0231857	0	0.0231857
736	31	17	LPG	Electricity	Tricycle	15.1238	0	0.0231857	0	0.0231857	0	0.0231857
737	31	18	LPG	Electricity	Tricycle	24.8736	0	0.00648939	0	0.00648939	0	0.00648939
738	31	19	Electricity	Electricity	Tricycle	24.8736	0	0.00648939	0	0.00648939	0	0.00648939	Sangitan public market
739	31	20	Electricity	Electricity	Tricycle	45.4795	0	0.104975	0	0.104975	0	0.104975
740	31	21	Electricity	Electricity	Tricycle	45.4795	0	0.104975	0	0.104975	0	0.104975	DepEd
741	31	22	LPG	Electricity	Tricycle	45.4795	0	0.104975	0	0.104975	0	0.104975
742	31	23	LPG	Electricity	Tricycle	21.5649	0	0.00475253	0	0.00475253	0	0.00475253
743	31	24	Electricity	Electricity	Tricycle	21.5649	0	0.00475253	0.000705254	0.00468148	0	0.00545778	NE Crossing
744	32	1	Open	Null	Null	0	0	0	0	0	0	0
745	32	2	Open	Null	Tricycle	0	0	1.54324e-05	0	1.54324e-05	0	1.54324e-05
746	32	3	Open	Null	Tricycle	0	0	0.00768755	0	0.00768755	0	0.00768755
747	32	4	LPG	Electricity	Tricycle	21.0469	0	0.00768755	0	0.00768755	0	0.00768755
748	32	5	LPG	Electricity	Tricycle	21.0469	0	0.00768755	0	0.00768755	0	0.00768755
749	32	6	LPG	Electricity	Tricycle	21.0469	0	0.00768755	0	0.00768755	0	0.00768755
750	32	7	LPG	Electricity	Tricycle	21.0469	0	0.00768755	0	0.00768755	0	0.00768755
751	32	8	LPG	Electricity	Tricycle	21.0469	0	0.00768755	0	0.00768755	0	0.00768755
752	32	9	LPG	Electricity	Tricycle	21.0469	0	0.00768755	0	0.00768755	0	0.00768755
753	32	10	LPG	Electricity	Tricycle	21.0469	0	0.00768755	0	0.00768755	0	0.00768755
754	32	11	Electricity	Electricity	Tricycle	21.0469	0	0.00768755	0	0.00768755	0	0.00768755
755	32	12	Open	Null	Null	0	0	0	0	0	0	0
756	32	13	LPG	Electricity	Tricycle	15.1238	0	0.0231857	0	0.0231857	0	0.0231857
757	32	14	LPG	Electricity	Tricycle	15.1238	0	0.0231857	0	0.0231857	0	0.0231857
758	32	15	LPG	Electricity	Tricycle	15.1238	0	0.0231857	0	0.0231857	0	0.0231857
759	32	16	LPG	Electricity	Tricycle	24.8736	0	0.00648939	0	0.00648939	0	0.00648939
760	32	17	LPG	Electricity	Tricycle	24.8736	0	0.00648939	0	0.00648939	0	0.00648939
761	32	18	LPG	Electricity	Tricycle	24.8736	0	0.00648939	0	0.00648939	0	0.00648939
762	32	19	Electricity	Electricity	Tricycle	24.8736	0	0.00648939	0	0.00648939	0	0.00648939	Sangitan public market
763	32	20	LPG	Electricity	Tricycle	45.4795	0	0.104975	0	0.104975	0	0.104975
764	32	21	LPG	Electricity	Tricycle	45.4795	0	0.104975	0	0.104975	0	0.104975
765	32	22	LPG	Electricity	Tricycle	21.5649	0	0.00475253	0	0.00475253	0	0.00475253
766	32	23	LPG	Electricity	Tricycle	21.5649	0	0.00475253	0	0.00475253	0	0.00475253
767	32	24	Electricity	Electricity	Tricycle	21.5649	0	0.00475253	0.000705254	0.00468148	0	0.00545778
768	33	1	Open	Null	Null	0	0	0	0	0	0	0
769	33	2	Open	Null	Null	0	0	0	0	0	0	0
770	33	3	Open	Null	Null	0	0	0	0	0	0	0
771	33	4	Open	Null	Tricycle	0	0	0.00768755	0	0.00768755	0	0.00768755
772	33	5	Open	Null	Tricycle	0	0	0.00768755	0	0.00768755	0	0.00768755
773	33	6	Open	Null	Tricycle	0	0	0.00768755	0	0.00768755	0	0.00768755
774	33	7	Open	Null	Null	0	0	0	0	0	0	0
775	33	8	Open	Null	Tricycle	0	0	0.00768755	0	0.00768755	0	0.00768755
776	33	9	LPG	Electricity	Tricycle	21.0469	0	0.00768755	0	0.00768755	0	0.00768755	Camella
777	33	10	LPG	Electricity	Tricycle	21.0469	0	0.00768755	0	0.00768755	0	0.00768755	Camella
778	33	11	Open	Null	Null	0	0	0	0	0	0	0
779	33	12	Open	Null	Null	0	0	0	0	0	0	0
780	33	13	LPG	Electricity	Tricycle	15.1238	0	0.0231857	0	0.0231857	0	0.0231857
781	33	14	Open	Null	Tricycle	0	0	0.0231857	0	0.0231857	0	0.0231857
782	33	15	LPG	Electricity	Tricycle	24.8736	0	0.00648939	0	0.00648939	0	0.00648939
783	33	16	LPG	Electricity	Tricycle	24.8736	0	0.00648939	0	0.00648939	0	0.00648939
784	33	17	LPG	Electricity	Tricycle	24.8736	0	0.00648939	0	0.00648939	0	0.00648939
785	33	18	LPG	Electricity	Tricycle	24.8736	0	0.00648939	0	0.00648939	0	0.00648939
786	33	19	LPG	Electricity	Tricycle	24.8736	0	0.00648939	0	0.00648939	0	0.00648939
787	33	20	LPG	Electricity	Tricycle	45.4795	0	0.104975	0	0.104975	0	0.104975
788	33	21	LPG	Electricity	Tricycle	45.4795	0	0.104975	0	0.104975	0	0.104975
789	33	22	LPG	Electricity	Tricycle	21.5649	0	0.00475253	0	0.00475253	0	0.00475253
790	33	23	LPG	Electricity	Tricycle	21.5649	0	0.00475253	0.000705254	0.00468148	0	0.00545778
791	33	24	Open	Null	Tricycle	0	0	0.00175598	0	0.00175598	0	0.00175598
792	34	1	Open	Null	Null	0	0	0	0	0	0	0
793	34	2	Open	Null	Tricycle	0	0	1.54324e-05	0	1.54324e-05	0	1.54324e-05
794	34	3	LPG	Electricity	Tricycle	1.54333	0	1.54324e-05	0	1.54324e-05	0	1.54324e-05
795	34	4	Open	Null	Tricycle	0	0	0.00768755	0	0.00768755	0	0.00768755
796	34	5	Open	Null	Null	0	0	0	0	0	0	0
797	34	6	Open	Null	Null	0	0	0	0	0	0	0
798	34	7	LPG	Electricity	Tricycle	21.0469	0	0.00768755	0	0.00768755	0	0.00768755	Camella
799	34	8	LPG	Electricity	Tricycle	21.0469	0	0.00768755	0	0.00768755	0	0.00768755	Camella
800	34	9	LPG	Electricity	Tricycle	21.0469	0	0.00768755	0	0.00768755	0	0.00768755	Camella
801	34	10	LPG	Electricity	Tricycle	21.0469	0	0.00768755	0	0.00768755	0	0.00768755	Camella
802	34	11	LPG	Electricity	Tricycle	21.0469	0	0.00768755	0	0.00768755	0	0.00768755
803	34	12	Open	Null	Tricycle	0	0	0.00768755	0	0.00768755	0	0.00768755
804	34	13	LPG	Electricity	Tricycle	15.1238	0	0.0231857	0	0.0231857	0	0.0231857
805	34	14	LPG	Electricity	Tricycle	24.8736	0	0.00648939	0	0.00648939	0	0.00648939
806	34	15	LPG	Electricity	Tricycle	24.8736	0	0.00648939	0	0.00648939	0	0.00648939
807	34	16	LPG	Electricity	Tricycle	24.8736	0	0.00648939	0	0.00648939	0	0.00648939
808	34	17	LPG	Electricity	Tricycle	24.8736	0	0.00648939	0	0.00648939	0	0.00648939
809	34	18	LPG	Electricity	Tricycle	24.8736	0	0.00648939	0	0.00648939	0	0.00648939
810	34	19	LPG	Electricity	Tricycle	45.4795	0	0.104975	0	0.104975	0	0.104975
811	34	20	LPG	Electricity	Tricycle	45.4795	0	0.104975	0	0.104975	0	0.104975
812	34	21	LPG	Electricity	Tricycle	21.5649	0	0.00475253	0	0.00475253	0	0.00475253
813	34	22	LPG	Electricity	Tricycle	21.5649	0	0.00475253	0	0.00475253	0	0.00475253
814	34	23	LPG	Electricity	Tricycle	21.5649	0	0.00475253	0.000705254	0.00468148	0	0.00545778
815	34	24	LPG	Electricity	Tricycle	10.3669	0	0.00175598	0	0.00175598	0	0.00175598
816	35	1	Open	Null	Tricycle	0	0	1.54324e-05	0	1.54324e-05	0	1.54324e-05
817	35	2	Open	Null	Null	0	0	0	0	0	0	0
818	35	3	LPG	Electricity	Tricycle	1.54333	0	1.54324e-05	0	1.54324e-05	0	1.54324e-05
819	35	4	Open	Null	Null	0	0	0	0	0	0	0
820	35	5	Open	Null	Null	0	0	0	0	0	0	0
821	35	6	Open	Null	Null	0	0	0	0	0	0	0
822	35	7	Open	Null	Null	0	0	0	0	0	0	0
823	35	8	LPG	Electricity	Tricycle	21.0469	0	0.00768755	0	0.00768755	0	0.00768755
824	35	9	LPG	Electricity	Tricycle	21.0469	0	0.00768755	0	0.00768755	0	0.00768755
825	35	10	LPG	Electricity	Tricycle	21.0469	0	0.00768755	0	0.00768755	0	0.00768755
826	35	11	LPG	Electricity	Tricycle	21.0469	0	0.00768755	0	0.00768755	0	0.00768755
827	35	12	Open	Null	Null	0	0	0	0	0	0	0
828	35	13	Open	Null	Null	0	0	0	0	0	0	0
829	35	14	Open	Null	Tricycle	0	0	0.00648939	0	0.00648939	0	0.00648939
830	35	15	Open	Null	Tricycle	0	0	0.00648939	0	0.00648939	0	0.00648939
831	35	16	Open	Null	Tricycle	0	0	0.00648939	0	0.00648939	0	0.00648939
832	35	17	Open	Electricity	Tricycle	24.8736	0	0.00648939	0	0.00648939	0	0.00648939
833	35	18	Open	Null	Tricycle	0	0	0.00648939	0	0.00648939	0	0.00648939
834	35	19	LPG	Electricity	Tricycle	45.4795	0	0.104975	0	0.104975	0	0.104975
835	35	20	LPG	Electricity	Tricycle	21.5649	0	0.00475253	0	0.00475253	0	0.00475253
836	35	21	LPG	Electricity	Tricycle	21.5649	0	0.00475253	0	0.00475253	0	0.00475253
837	35	22	LPG	Electricity	Tricycle	21.5649	0	0.00475253	0	0.00475253	0	0.00475253
838	35	23	LPG	Electricity	Tricycle	21.5649	0	0.00475253	0.000705254	0.00468148	0	0.00545778
839	35	24	LPG	Electricity	Null	10.3669	0	0	0	0	0	0
840	36	1	Open	Null	Tricycle	0	0	1.54324e-05	0	1.54324e-05	0	1.54324e-05
841	36	2	Open	Null	Null	0	0	0	0	0	0	0
842	36	3	Fuels	Null	Tricycle	0	0.00714184	1.54324e-05	0	1.54324e-05	0	0.00715728
843	36	4	Open	Null	Null	0	0	0	0	0	0	0
844	36	5	Open	Null	Null	0	0	0	0	0	0	0
845	36	6	Open	Null	Tricycle	0	0	0.00768755	0	0.00768755	0	0.00768755
846	36	7	LPG	Electricity	Tricycle	21.0469	0	0.00768755	0	0.00768755	0	0.00768755
847	36	8	Open	Null	Tricycle	0	0	0.00768755	0	0.00768755	0	0.00768755
848	36	9	LPG	Electricity	Tricycle	21.0469	0	0.00768755	0	0.00768755	0	0.00768755
849	36	10	Open	Null	Tricycle	0	0	0.00768755	0	0.00768755	0	0.00768755
850	36	11	Agri	Null	Tricycle	0	0	0.00768755	0	0.00768755	0	0.00768755
851	36	12	Agri	Null	Null	0	0	0	0	0	0	0
852	36	13	Agri	Null	Null	0	0	0	0	0	0.217625	0.217625
853	36	14	Open	Null	Tricycle	0	0	0.00648939	0	0.00648939	0	0.00648939
854	36	15	LPG	Electricity	Tricycle	24.8736	0	0.00648939	0	0.00648939	0	0.00648939
855	36	16	Agri	Null	Null	0	0	0	0	0	0.217625	0.217625
856	36	17	Open	Null	Null	0	0	0	0	0	0	0
857	36	18	Open	Null	Tricycle	0	0	0.00648939	0	0.00648939	0	0.00648939
858	36	19	LPG	Electricity	Tricycle	45.4795	0	0.104975	0	0.104975	0	0.104975
859	36	20	LPG	Electricity	Tricycle	21.5649	0	0.00475253	0	0.00475253	0	0.00475253
860	36	21	Open	Null	Null	0	0	0	0	0	0	0
861	36	22	LPG	Electricity	Tricycle	21.5649	0	0.00475253	0	0.00475253	0	0.00475253
862	36	23	LPG	Electricity	Tricycle	21.5649	0	0.00475253	0.000705254	0.00468148	0	0.00545778
863	36	24	LPG	Electricity	Null	10.3669	0	0	0	0	0	0
864	37	1	Open	Null	Null	0	0	0	0	0	0	0
865	37	2	Open	Null	Tricycle	0	0	1.54324e-05	0	1.54324e-05	0	1.54324e-05
866	37	3	Agri	Null	Null	0	0	0	0	0	0.748857	0.748857
867	37	4	Agri	Null	Null	0	0	0	0	0	0.748857	0.748857
868	37	5	Agri	Null	Null	0	0	0	0	0	0.748857	0.748857
869	37	6	Open	Null	Null	0	0	0	0	0	0	0
870	37	7	Open	Null	Tricycle	0	0	0.00768755	0	0.00768755	0	0.00768755
871	37	8	Agri	Null	Null	0	0	0	0	0	0	0
872	37	9	Agri	Null	Null	0	0	0	0	0	0	0
873	37	10	Open	Null	Tricycle	0	0	0.00768755	0	0.00768755	0	0.00768755
874	37	11	Agri	Null	Tricycle	0	0	0.00768755	0	0.00768755	0	0.00768755
875	37	12	Agri	Null	Null	0	0	0	0	0	0.217625	0.217625
876	37	13	Agri	Null	Null	0	0	0	0	0	0.217625	0.217625
877	37	14	Open	Null	Null	0	0	0	0	0	0	0
878	37	15	Open	Null	Tricycle	0	0	0.00648939	0	0.00648939	0	0.00648939
879	37	16	Agri	Null	Null	0	0	0	0	0	0.217625	0.217625
880	37	17	Agri	Null	Null	0	0	0	0	0	0.217625	0.217625
881	37	18	Open	Null	Tricycle	0	0	0.00648939	0	0.00648939	0	0.00648939
882	37	19	Open	Null	Null	0	0	0	0	0	0	0
883	37	20	LPG	Electricity	Tricycle	21.5649	0	0.00475253	0	0.00475253	0	0.00475253
884	37	21	LPG	Electricity	Tricycle	21.5649	0	0.00475253	0	0.00475253	0	0.00475253
885	37	22	LPG	Electricity	Tricycle	21.5649	0	0.00475253	0	0.00475253	0	0.00475253
886	37	23	Open	Null	Tricycle	0	0	0.00475253	0.000705254	0.00468148	0	0.00545778
887	37	24	Open	Null	Null	0	0	0	0	0	0	0
888	38	1	Open	Null	Null	0	0	0	0	0	0	0
889	38	2	Open	Null	Tricycle	0	0	0.000140761	0	0.000140761	0	0.000140761
890	38	3	Agri	Null	Tricycle	0	0	0.000140761	0	0.000140761	0.748857	0.748997
891	38	4	Agri	Null	Null	0	0	0	0	0	0.748857	0.748857
892	38	5	Open	Null	Null	0	0	0	0	0	0	0
893	38	6	Open	Null	Null	0	0	0	0	0	0	0
894	38	7	Agri	Null	Null	0	0	0	0	0	0	0
895	38	8	Agri	Null	Null	0	0	0	0	0	0	0
896	38	9	Agri	Null	Null	0	0	0	0	0	0	0
897	38	10	Agri	Null	Null	0	0	0	0	0	0	0
898	38	11	Agri	Null	Null	0	0	0	0	0	0.217625	0.217625
899	38	12	Agri	Null	Null	0	0	0	0	0	0.217625	0.217625
900	38	13	Agri	Null	Null	0	0	0	0	0	0.217625	0.217625
901	38	14	Agri	Null	Null	0	0	0	0	0	0.217625	0.217625
902	38	15	Open	Null	Tricycle	0	0	0.00648939	0	0.00648939	0	0.00648939
903	38	16	Agri	Null	Null	0	0	0	0	0	0.217625	0.217625
904	38	17	Agri	Null	Null	0	0	0	0	0	0.217625	0.217625
905	38	18	LPG	Electricity	Tricycle	45.4795	0	0.104975	0	0.104975	0	0.104975
906	38	19	LPG	Electricity	Tricycle	21.5649	0	0.00475253	0	0.00475253	0	0.00475253
907	38	20	LPG	Electricity	Tricycle	21.5649	0	0.00475253	0	0.00475253	0	0.00475253
908	38	21	LPG	Electricity	Tricycle	21.5649	0	0.00475253	0	0.00475253	0	0.00475253
909	38	22	Open	Null	Tricycle	0	0	0.00475253	0.000705254	0.00468148	0	0.00545778
910	38	23	Open	Null	Tricycle	0	0	0.00475253	0	0.00475253	0	0.00475253
911	38	24	Open	Null	Tricycle	0	0	0.00175598	0	0.00175598	0	0.00175598
912	39	1	Open	Null	Null	0	0	0	0	0	0	0
913	39	2	Open	Null	Tricycle	0	0	0.000140761	0	0.000140761	0	0.000140761
914	39	3	LPG	Null	Tricycle	0	0	0.000140761	0	0.000140761	0	0.000140761
915	39	4	Open	Null	Tricycle	0	0	0.000140761	0	0.000140761	0	0.000140761
916	39	5	Open	Null	Tricycle	0	0	0.000140761	0	0.000140761	0	0.000140761
917	39	6	Agri	Null	Null	0	0	0	0	0	0.748857	0.748857
918	39	7	Agri	Null	Null	0	0	0	0	0	0.748857	0.748857
919	39	8	Agri	Null	Null	0	0	0	0	0	0.748857	0.748857
920	39	9	Agri	Null	Null	0	0	0	0	0	0.748857	0.748857
921	39	10	Agri	Null	Null	0	0	0	0	0	0.75841	0.75841
922	39	11	Agri	Null	Null	0	0	0	0	0	0.217625	0.217625
923	39	12	Agri	Null	Null	0	0	0	0	0	0.217625	0.217625
924	39	13	Agri	Null	Null	0	0	0	0	0	0.217625	0.217625
925	39	14	Agri	Null	Null	0	0	0	0	0	0.217625	0.217625
926	39	15	Agri	Null	Null	0	0	0	0	0	0.217625	0.217625
927	39	16	Agri	Null	Tricycle	0	0	0.00648939	0	0.00648939	0.217625	0.224115
928	39	17	LPG	Electricity	Null	24.8736	0	0	0	0	0	0
929	39	18	LPG	Electricity	Tricycle	45.4795	0	0.104975	0	0.104975	0	0.104975
930	39	19	LPG	Electricity	Tricycle	21.5649	0	0.00475253	0	0.00475253	0	0.00475253
931	39	20	LPG	Electricity	Tricycle	21.5649	0	0.00475253	0	0.00475253	0	0.00475253
932	39	21	Open	Null	Tricycle	0	0	0.00475253	0	0.00475253	0	0.00475253
933	39	22	LPG	Electricity	Tricycle	21.5649	0	0.00475253	0.000705254	0.00468148	0	0.00545778
934	39	23	Open	Null	Null	0	0	0	0	0	0	0
935	39	24	Open	Null	Tricycle	0	0	0.00175598	0	0.00175598	0	0.00175598
936	40	1	LPG	Null	Tricycle	0	0	0.000140761	0	0.000140761	0	0.000140761
937	40	2	Open	Null	Tricycle	0	0	0.000140761	0	0.000140761	0	0.000140761
938	40	3	LPG	Null	Tricycle	0	0	0.000140761	0	0.000140761	0	0.000140761
939	40	4	LPG	Null	Tricycle	0	0	0.000140761	0	0.000140761	0	0.000140761
940	40	5	LPG	Electricity	Tricycle	2.5408	0	0.000140761	0	0.000140761	0	0.000140761
941	40	6	Open	Null	Tricycle	0	0	0.000140761	0	0.000140761	0	0.000140761
942	40	7	Open	Null	Tricycle	0	0	0.000140761	0	0.000140761	0	0.000140761
943	40	8	Open	Null	Tricycle	0	0	0.000140761	0	0.000140761	0	0.000140761
944	40	9	Agri	Null	Null	0	0	0	0	0	0.748857	0.748857
945	40	10	Agri	Null	Null	0	0	0	0	0	0.748857	0.748857
946	40	11	Agri	Null	Null	0	0	0	0	0	0.75841	0.75841
947	40	12	Agri	Null	Null	0	0	0	0	0	0.75841	0.75841
948	40	13	Agri	Null	Null	0	0	0	0	0	0.75841	0.75841
949	40	14	Agri	Null	Null	0	0	0	0	0	0.75841	0.75841
950	40	15	Agri	Null	Null	0	0	0	0	0	0.75841	0.75841
951	40	16	Open	Null	Tricycle	0	0	9.03267e-05	0	7.55722e-05	0	9.03267e-05
952	40	17	Agri	Null	Null	0	0	0	0	0	0.75841	0.75841
953	40	18	Agri	Null	Null	0	0	0	0	0	0.75841	0.75841
954	40	19	Open	Null	Null	0	0	0	0	0	0	0
955	40	20	Open	Null	Tricycle	0	0	9.03267e-05	0	7.55722e-05	0	9.03267e-05
956	40	21	LPG	Electricity	Tricycle	2.71254	0	9.03267e-05	0	7.55722e-05	0	9.03267e-05
957	40	22	Open	Null	Tricycle	0	0	9.03267e-05	1.34041e-05	8.89763e-05	0	0.000103731
958	40	23	Electricity	Electricity	Tricycle	21.5649	0	0.00475253	0	0.00475253	0	0.00475253
959	40	24	Open	Null	Tricycle	0	0	0.00175598	0	0.00175598	0	0.00175598
